# Supplementary material for: Universal and taxon-specific trends in protein sequences as a function of age
Source: eLife. 2021 Jan 8;10:e57347. doi: 10.7554/eLife.57347 (PMC7819706; doi:10.7554/eLife.57347)
Supplement: Supplementary file 1. [file elife-57347-supp1.xlsx]

## Sheet: Sheet1
		Nontransmembrane pfam domains																	Transmembrane pfam domains
		Animal and plant specific domains (<=1496 MY old)						Ancient slope, assessed in animals and plants (>=2101)						Ancient slope, all species (>=2101)					Animal and plant specific domains (<=1496 MY old)						Ancient slope, assessed in animals and plants (>=2101)						Ancient slope, all species (>=2101)
Amino Acid	3-letter code	Animal Slope	Animal Standard error	Animal p	Plant Slope	Plant Standard Error	Plant p	Animal Slope	Animal Standard error	Animal p	Plant Slope	Plant Standard Error	Plant p	Slope	Standard error	p	Amino Acid	3-letter code	Animal Slope	Animal Standard error	Animal p	Plant Slope	Plant Standard Error	Plant p	Animal Slope	Animal Standard error	Animal p	Plant Slope	Plant Standard Error	Plant p	Slope	Standard error	p
A	Ala	-2.1e-06	1.77e-06	0.236175	7.48e-06	8.08e-06	0.355745	9.23e-06	1.56e-06	3.36e-09	8.67e-06	1.66e-06	1.85e-07	9.33e-06	1.42e-06	5.87e-11	A	Ala	-1.82e-06	4.09e-06	0.656999	3.55e-07	1.55e-05	0.981818	1.14e-05	2.48e-06	5.09e-06	7.55e-06	3.02e-06	0.0125951	1.09e-05	2.32e-06	3.15e-06
C	Cys	-1.88e-06	2.11e-06	0.37469	-2.07e-05	8.89e-06	0.0210099	-5.92e-06	1.4e-06	2.51e-05	-6.56e-06	1.34e-06	1.08e-06	-5.93e-06	1.34e-06	1.09e-05	C	Cys	3.21e-06	3.37e-06	0.341228	-1.06e-05	8.19e-06	0.201593	-1.85e-06	1.52e-06	0.224241	-2.56e-06	1.35e-06	0.0589424	-2.66e-06	1.37e-06	0.0534924
D	Asp	2.54e-06	1.42e-06	0.0737742	-7.41e-06	3.83e-06	0.054727	1.72e-07	1.12e-06	0.877577	-3.97e-07	1.11e-06	0.721137	2.87e-08	1.06e-06	0.978363	D	Asp	3.53e-06	2.51e-06	0.159606	5.58e-06	6.3e-06	0.379281	-9.01e-07	1.54e-06	0.560041	3.83e-07	1.73e-06	0.824707	1.35e-07	1.4e-06	0.922841
E	Glu	9.95e-06	2.19e-06	5.82e-06	-5.11e-06	6.77e-06	0.451455	-2.46e-06	1.29e-06	0.0565882	-5.25e-07	1.42e-06	0.711134	-1.93e-06	1.26e-06	0.126141	E	Glu	2.31e-06	3.26e-06	0.478558	-1.73e-06	7.71e-06	0.823576	-4.97e-06	1.78e-06	0.00532716	-1.6e-07	1.99e-06	0.936135	-2.93e-06	1.63e-06	0.0730677
F	Phe	2.35e-06	1.35e-06	0.0808496	1.92e-06	4.03e-06	0.634668	-5.39e-06	1.04e-06	2.57e-07	-5.19e-06	1.08e-06	1.6e-06	-5.77e-06	1.02e-06	1.63e-08	F	Phe	6.27e-06	3.41e-06	0.0666655	3.66e-06	8.54e-06	0.669859	-6.54e-06	1.96e-06	0.000867293	-6.37e-06	2.13e-06	0.00293971	-6.65e-06	1.79e-06	0.000214131
G	Gly	-1.18e-05	2.03e-06	7.04e-09	5.35e-07	5.96e-06	0.928613	9.01e-06	1.55e-06	7.01e-09	7.99e-06	1.58e-06	4.36e-07	8.71e-06	1.51e-06	8.57e-09	G	Gly	-5.31e-06	4.27e-06	0.214785	9.29e-06	8.62e-06	0.285386	1.21e-05	2.52e-06	2e-06	9.49e-06	2.78e-06	0.000663439	1.16e-05	2.28e-06	4.68e-07
H	His	-4.2e-07	9.72e-07	0.666098	-2.41e-06	3.04e-06	0.429893	-1.7e-06	7.15e-07	0.0174047	-1.49e-06	7.57e-07	0.0489517	-1.73e-06	6.85e-07	0.0118559	H	His	-1.75e-07	1.63e-06	0.914667	-9.16e-06	6.26e-06	0.148863	-3.6e-08	1.14e-06	0.974923	-2.14e-06	1.21e-06	0.0760806	-6.36e-07	1.02e-06	0.531319
I	Ile	6.92e-06	1.4e-06	7.71e-07	-2.98e-07	4.08e-06	0.94191	4.17e-06	1.05e-06	7.16e-05	3.78e-06	1.06e-06	0.000395926	3.87e-06	9.51e-07	4.85e-05	I	Ile	6.13e-06	3.54e-06	0.0842598	3.19e-06	8.69e-06	0.715295	4.72e-07	2.06e-06	0.818494	4.03e-06	2.09e-06	0.0538996	1.3e-06	1.79e-06	0.465313
K	Lys	8.26e-06	2.07e-06	6.63e-05	5.82e-06	6.63e-06	0.380706	-1.68e-06	1.46e-06	0.24983	-7.03e-07	1.5e-06	0.639735	-1.61e-06	1.36e-06	0.23531	K	Lys	4.64e-06	3.11e-06	0.135621	1.37e-05	1e-05	0.17623	-2.78e-06	2.04e-06	0.173165	-4.32e-06	2.01e-06	0.0320767	-4e-06	1.77e-06	0.0241472
L	Leu	1.36e-05	2.28e-06	2.82e-09	2.79e-06	7.28e-06	0.702391	6.12e-07	1.61e-06	0.704389	-4.77e-07	1.66e-06	0.774158	8.91e-07	1.58e-06	0.573442	L	Leu	-1.13e-05	4.7e-06	0.016881	-5.87e-06	1.09e-05	0.593569	-1.33e-06	2.69e-06	0.622506	-5.9e-06	2.81e-06	0.035822	-2.99e-06	2.38e-06	0.210159
M	Met	1.41e-06	7.9e-07	0.0752058	-1.33e-07	2.65e-06	0.960002	6.04e-07	6.02e-07	0.315892	9.26e-07	6.38e-07	0.147116	6.83e-07	5.76e-07	0.235723	M	Met	2.37e-07	1.78e-06	0.894141	-9.68e-06	3.91e-06	0.0161453	7.48e-08	1.24e-06	0.952051	3.31e-07	1.25e-06	0.791206	3.17e-07	1.12e-06	0.777064
N	Asn	-1.38e-06	1.23e-06	0.262654	2.43e-06	3.62e-06	0.503241	-3.37e-06	8.6e-07	9.25e-05	-3.74e-06	8.88e-07	2.6e-05	-3.59e-06	8.01e-07	7.37e-06	N	Asn	-1.33e-06	2.33e-06	0.567376	-1.18e-06	5.73e-06	0.837835	-2.75e-06	1.5e-06	0.065939	-4.07e-06	1.69e-06	0.0163287	-3.54e-06	1.42e-06	0.0127306
P	Pro	-2.27e-05	2.4e-06	9.63e-21	6.43e-07	5.29e-06	0.903426	-7.62e-07	1.12e-06	0.496886	8.12e-08	1.09e-06	0.940697	-4.23e-07	1.07e-06	0.692251	P	Pro	-1.45e-05	3.7e-06	9.56e-05	-5.34e-06	7.75e-06	0.493881	1.12e-07	1.38e-06	0.935244	9.84e-07	1.58e-06	0.533488	4.49e-07	1.31e-06	0.731181
Q	Gln	3.46e-06	1.79e-06	0.0532806	-3.2e-06	5.94e-06	0.590458	-3.86e-06	8.12e-07	2.1e-06	-2.92e-06	7.92e-07	0.000229991	-3.57e-06	7.36e-07	1.28e-06	Q	Gln	-1.61e-06	2.28e-06	0.479103	4.94e-06	4.53e-06	0.279835	-2.67e-06	1.2e-06	0.026543	-1.76e-06	1.24e-06	0.156557	-2.81e-06	1.06e-06	0.00814565
R	Arg	2.98e-06	1.94e-06	0.123273	8.46e-06	5.85e-06	0.149561	-6.24e-07	1.2e-06	0.603402	-3.41e-07	1.32e-06	0.796474	-2.78e-07	1.17e-06	0.812206	R	Arg	2.18e-06	2.93e-06	0.456912	1.03e-05	8.06e-06	0.206965	-1.9e-06	1.6e-06	0.235752	-2.66e-07	1.79e-06	0.881854	-3.18e-07	1.48e-06	0.830066
S	Ser	-1.42e-05	2.19e-06	1.19e-10	6.33e-07	6.71e-06	0.925043	-1.61e-06	1e-06	0.107516	-3.26e-06	1.13e-06	0.00398876	-1.4e-06	1e-06	0.163653	S	Ser	-4.16e-06	3.28e-06	0.204578	-1.43e-05	1.02e-05	0.164227	-1.68e-06	1.8e-06	0.351201	-1.62e-06	2.05e-06	0.429661	-1.96e-06	1.64e-06	0.231685
T	Thr	-3.48e-06	1.36e-06	0.0105104	6.53e-07	3.78e-06	0.86307	2.38e-06	8.91e-07	0.00760904	1.45e-06	9.69e-07	0.133527	1.54e-06	8.56e-07	0.0730244	T	Thr	1.44e-06	2.98e-06	0.629543	1.55e-05	6.18e-06	0.0146805	1.39e-06	1.61e-06	0.389746	2.88e-06	1.68e-06	0.0861735	1.48e-06	1.48e-06	0.316771
V	Val	5.07e-06	1.41e-06	0.000314926	6.87e-06	4.73e-06	0.148005	7.06e-06	1.15e-06	8.73e-10	7.77e-06	1.3e-06	2.4e-09	7.29e-06	1.15e-06	2.79e-10	V	Val	1.37e-06	3.05e-06	0.653092	-6.14e-06	1.04e-05	0.558205	6.52e-06	1.93e-06	0.00076359	6.72e-06	2.26e-06	0.00301801	6.61e-06	1.85e-06	0.000370234
W	Trp	-1.99e-07	7.59e-07	0.793061	-4.79e-07	2.5e-06	0.848186	-1.28e-06	6.27e-07	0.0405167	-1.68e-06	6.57e-07	0.0107087	-1.55e-06	6.18e-07	0.0123689	W	Trp	9.05e-07	1.52e-06	0.550775	-6.06e-06	4.9e-06	0.220633	-7.49e-07	9.91e-07	0.449987	-1.39e-07	1.12e-06	0.9012	-1.83e-07	9.19e-07	0.842142
Y	Tyr	1.53e-06	1.23e-06	0.215308	1.48e-06	3.02e-06	0.625494	-4.55e-06	8.86e-07	2.95e-07	-3.36e-06	8.79e-07	0.000137963	-4.54e-06	8.43e-07	7.74e-08	Y	Tyr	8.77e-06	2.38e-06	0.000243812	2.1e-06	4.85e-06	0.666212	-4.76e-06	1.61e-06	0.00330207	-3.3e-06	1.57e-06	0.0355265	-4.23e-06	1.41e-06	0.00276571
