# Supplementary material for: Universal and taxon-specific trends in protein sequences as a function of age
Source: eLife. 2021 Jan 8;10:e57347. doi: 10.7554/eLife.57347 (PMC7819706; doi:10.7554/eLife.57347)
Supplement: Supplementary file 2. [file elife-57347-supp2.xlsx]

## Sheet: Full_list
SpeciesUID	SpeciesName	NewickSpeciesName	Kingdom
3	AiluropodaMelanoleuca	Ailuropoda_melanoleuca	vertebrate
4	AnasPlatyrhynchos	Anas_platyrhynchos	vertebrate
5	AnolisCarolinensis	Anolis_carolinensis	vertebrate
6	AotusNancymaae	Aotus_nancymaae	vertebrate
8	CaenorhabditisElegans	Caenorhabditis_elegans	vertebrate
9	CallithrixJacchus	Callithrix_jacchus	vertebrate
10	CanisLupusFamiliaris	Canis_lupus	vertebrate
11	CapraHircus	Capra_hircus	vertebrate
12	CarlitoSyrichta	Carlito_syrichta	vertebrate
13	CaviaAperea	Cavia_aperea	vertebrate
14	CaviaPorcellus	Cavia_porcellus	vertebrate
15	CebusCapucinusImitator	Cebus_capucinus	vertebrate
16	CercocebusAtys	Cercocebus_atys	vertebrate
17	ChinchillaLanigera	Chinchilla_lanigera	vertebrate
18	ChlorocebusSabaeus	Chlorocebus_sabaeus	vertebrate
19	CionaIntestinalis	Ciona_intestinalis	vertebrate
20	ColobusAngolensisPalliatus	Colobus_angolensis	vertebrate
21	CricetulusGriseus	Cricetulus_griseus	vertebrate
22	CricetulusGriseus	Cricetulus_griseus	vertebrate
23	DanioRerio	Danio_rerio	vertebrate
24	DasypusNovemcinctus	Dasypus_novemcinctus	vertebrate
25	DipodomysOrdii	Dipodomys_ordii	vertebrate
26	DrosophilaMelanogaster	Drosophila_melanogaster	vertebrate
27	EptatretusBurgeri	Eptatretus_burgeri	vertebrate
28	EquusCaballus	Equus_caballus	vertebrate
29	FelisCatus	Felis_catus	vertebrate
30	FicedulaAlbicollis	Ficedula_albicollis	vertebrate
31	FukomysDamarensis	Fukomys_damarensis	vertebrate
32	GadusMorhua	Gadus_morhua	vertebrate
33	GallusGallus	Gallus_gallus	vertebrate
34	GasterosteusAculeatus	Gasterosteus_aculeatus	vertebrate
35	GorillaGorillaGorilla	Gorilla_gorilla	vertebrate
36	HeterocephalusGlaber	Heterocephalus_glaber	vertebrate
38	HomoSapiens	Homo_sapiens	vertebrate
39	IctidomysTridecemlineatus	Ictidomys_tridecemlineatus	vertebrate
40	JaculusJaculus	Jaculus_jaculus	vertebrate
41	LatimeriaChalumnae	Latimeria_chalumnae	vertebrate
42	LepisosteusOculatus	Lepisosteus_oculatus	vertebrate
43	LoxodontaAfricana	Loxodonta_africana	vertebrate
44	MacacaFascicularis	Macaca_fascicularis	vertebrate
45	MacacaMulatta	Macaca_mulatta	vertebrate
46	MacacaNemestrina	Macaca_nemestrina	vertebrate
47	MandrillusLeucophaeus	Mandrillus_leucophaeus	vertebrate
48	MeleagrisGallopavo	Meleagris_gallopavo	vertebrate
49	MesocricetusAuratus	Mesocricetus_auratus	vertebrate
50	MicrocebusMurinus	Microcebus_murinus	vertebrate
51	MicrotusOchrogaster	Microtus_ochrogaster	vertebrate
52	MonodelphisDomestica	Monodelphis_domestica	vertebrate
53	MusCaroli	Mus_caroli	vertebrate
54	MusMusculus	Mus_musculus	vertebrate
55	MusPahari	Mus_pahari	vertebrate
56	MusSpretus	Mus_spretus	vertebrate
57	MustelaPutoriusFuro	Mustela_putorius	vertebrate
58	MyotisLucifugus	Myotis_lucifugus	vertebrate
59	NannospalaxGalili	Nannospalax_galili	vertebrate
60	NomascusLeucogenys	Nomascus_leucogenys	vertebrate
61	OctodonDegus	Octodon_degus	vertebrate
62	OrnithorhynchusAnatinus	Ornithorhynchus_anatinus	vertebrate
63	OryctolagusCuniculus	Oryctolagus_cuniculus	vertebrate
64	OryziasLatipes	Oryzias_latipes	vertebrate
65	OtolemurGarnettii	Otolemur_garnettii	vertebrate
66	OvisAries	Ovis_aries	vertebrate
67	PanPaniscus	Pan_paniscus	vertebrate
68	PanTroglodytes	Pan_troglodytes	vertebrate
69	PantheraPardus	Panthera_pardus	vertebrate
70	PantheraTigrisAltaica	Panthera_tigris	vertebrate
71	PapioAnubis	Papio_anubis	vertebrate
72	PelodiscusSinensis	Pelodiscus_sinensis	vertebrate
73	PeromyscusManiculatusBairdii	Peromyscus_maniculatus	vertebrate
74	PetromyzonMarinus	Petromyzon_marinus	vertebrate
75	PropithecusCoquereli	Propithecus_coquereli	vertebrate
76	RattusNorvegicus	Rattus_norvegicus	vertebrate
77	RhinopithecusBieti	Rhinopithecus_bieti	vertebrate
78	RhinopithecusRoxellana	Rhinopithecus_roxellana	vertebrate
79	SaccharomycesCerevisiae	Saccharomyces_cerevisiae	vertebrate
80	SaimiriBoliviensisBoliviensis	Saimiri_boliviensis	vertebrate
81	SarcophilusHarrisii	Sarcophilus_harrisii	vertebrate
82	SusScrofa	Sus_scrofa	vertebrate
83	TaeniopygiaGuttata	Taeniopygia_guttata	vertebrate
84	TakifuguRubripes	Takifugu_rubripes	vertebrate
85	TetraodonNigroviridis	Tetraodon_nigroviridis	vertebrate
86	XenopusTropicalis	Xenopus_tropicalis	vertebrate
87	XiphophorusMaculatus	Xiphophorus_maculatus	vertebrate
135	AegilopsTauschii	Aegilops_tauschii	plant
136	AmborellaTrichopoda	Amborella_trichopoda	plant
137	ArabidopsisLyrata	Arabidopsis_lyrata	plant
138	ArabidopsisThaliana	Arabidopsis_thaliana	plant
139	BetaVulgaris	Beta_vulgaris	plant
140	BrachypodiumDistachyon	Brachypodium_distachyon	plant
141	BrassicaNapus	Brassica_napus	plant
142	BrassicaOleracea	Brassica_oleracea	plant
143	BrassicaRapa	Brassica_rapa	plant
145	ChlamydomonasReinhardtii	Chlamydomonas_reinhardtii	plant
146	ChondrusCrispus	Chondrus_crispus	plant
147	CucumisSativus	Cucumis_sativus	plant
148	CyanidioschyzonMerolae	Cyanidioschyzon_merolae	plant
149	DaucusCarota	Daucus_carota	plant
150	GaldieriaSulphuraria	Galdieria_sulphuraria	plant
151	GlycineMax	Glycine_max	plant
152	GossypiumRaimondii	Gossypium_raimondii	plant
153	HelianthusAnnuus	Helianthus_annuus	plant
154	HordeumVulgare	Hordeum_vulgare	plant
155	LupinusAngustifolius	Lupinus_angustifolius	plant
156	ManihotEsculenta	Manihot_esculenta	plant
157	MedicagoTruncatula	Medicago_truncatula	plant
158	MusaAcuminata	Musa_acuminata	plant
159	OryzaBarthii	Oryza_barthii	plant
160	OryzaBrachyantha	Oryza_brachyantha	plant
161	OryzaGlaberrima	Oryza_glaberrima	plant
163	OryzaMeridionalis	Oryza_meridionalis	plant
164	OryzaPunctata	Oryza_punctata	plant
165	OryzaRufipogon	Oryza_rufipogon	plant
166	OstreococcusLucimarinus	Ostreococcus_lucimarinus	plant
167	PhaseolusVulgaris	Phaseolus_vulgaris	plant
168	PhyscomitrellaPatens	Physcomitrella_patens	plant
169	PopulusTrichocarpa	Populus_trichocarpa	plant
170	PrunusPersica	Prunus_persica	plant
171	SelaginellaMoellendorffii	Selaginella_moellendorffii	plant
173	SolanumTuberosum	Solanum_tuberosum	plant
174	SorghumBicolor	Sorghum_bicolor	plant
175	TheobromaCacao	Theobroma_cacao	plant
176	TrifoliumPratense	Trifolium_pratense	plant
177	TriticumAestivum	Triticum_aestivum	plant
178	TriticumUrartu	Triticum_urartu	plant
179	VitisVinifera	Vitis_vinifera	plant
180	ZeaMays	Zea_mays	plant
181	AcyrthosiphonPisum	Acyrthosiphon_pisum	invertebrate
182	AedesAegypti	Aedes_aegypti	invertebrate
183	AmphimedonQueenslandica	Amphimedon_queenslandica	invertebrate
184	AnophelesDarlingi	Anopheles_darlingi	invertebrate
185	AnophelesGambiae	Anopheles_gambiae	invertebrate
186	ApisMellifera	Apis_mellifera	invertebrate
187	AttaCephalotes	Atta_cephalotes	invertebrate
188	BelgicaAntarctica	Belgica_antarctica	invertebrate
189	BombyxMori	Bombyx_mori	invertebrate
190	BrugiaMalayi	Brugia_malayi	invertebrate
191	CaenorhabditisBrenneri	Caenorhabditis_brenneri	invertebrate
192	CaenorhabditisBriggsae	Caenorhabditis_briggsae	invertebrate
194	CaenorhabditisJaponica	Caenorhabditis_japonica	invertebrate
195	CaenorhabditisRemanei	Caenorhabditis_remanei	invertebrate
196	CapitellaTeleta	Capitella_teleta	invertebrate
197	CrassostreaGigas	Crassostrea_gigas	invertebrate
198	CulexQuinquefasciatus	Culex_quinquefasciatus	invertebrate
199	DanausPlexippus	Danaus_plexippus	invertebrate
200	DaphniaPulex	Daphnia_pulex	invertebrate
201	DendroctonusPonderosae	Dendroctonus_ponderosae	invertebrate
202	DrosophilaAnanassae	Drosophila_ananassae	invertebrate
203	DrosophilaErecta	Drosophila_erecta	invertebrate
204	DrosophilaGrimshawi	Drosophila_grimshawi	invertebrate
206	DrosophilaMojavensis	Drosophila_mojavensis	invertebrate
207	DrosophilaPersimilis	Drosophila_persimilis	invertebrate
208	DrosophilaPseudoobscura	Drosophila_pseudoobscura	invertebrate
209	DrosophilaSechellia	Drosophila_sechellia	invertebrate
210	DrosophilaSimulans	Drosophila_simulans	invertebrate
211	DrosophilaVirilis	Drosophila_virilis	invertebrate
212	DrosophilaWillistoni	Drosophila_willistoni	invertebrate
213	DrosophilaYakuba	Drosophila_yakuba	invertebrate
214	HeliconiusMelpomene	Heliconius_melpomene	invertebrate
215	HelobdellaRobusta	Helobdella_robusta	invertebrate
216	LepeophtheirusSalmonis	Lepeophtheirus_salmonis	invertebrate
217	LuciliaCuprina	Lucilia_cuprina	invertebrate
218	MayetiolaDestructor	Mayetiola_destructor	invertebrate
219	MelitaeaCinxia	Melitaea_cinxia	invertebrate
220	MnemiopsisLeidyi	Mnemiopsis_leidyi	invertebrate
221	NematostellaVectensis	Nematostella_vectensis	invertebrate
222	OctopusBimaculoides	Octopus_bimaculoides	invertebrate
223	PediculusHumanus	Pediculus_humanus	invertebrate
224	PristionchusPacificus	Pristionchus_pacificus	invertebrate
225	RhodniusProlixus	Rhodnius_prolixus	invertebrate
226	SolenopsisInvicta	Solenopsis_invicta	invertebrate
227	StegodyphusMimosarum	Stegodyphus_mimosarum	invertebrate
228	StrigamiaMaritima	Strigamia_maritima	invertebrate
229	TriboliumCastaneum	Tribolium_castaneum	invertebrate
230	TrichoplaxAdhaerens	Trichoplax_adhaerens	invertebrate
231	ZootermopsisNevadensis	Zootermopsis_nevadensis	invertebrate
233	BigelowiellaNatans	Bigelowiella_natans	protozoa
237	DictyosteliumDiscoideum	Dictyostelium_discoideum	protozoa
239	EmilianiaHuxleyi	Emiliania_huxleyi	protozoa
240	EntamoebaHistolytica	Entamoeba_histolytica	protozoa
242	GiardiaLamblia	Giardia_intestinalis	protozoa
243	HyaloperonosporaArabidopsidis	Hyaloperonospora_arabidopsidis	protozoa
246	LeishmaniaMajor	Leishmania_major	protozoa
251	PhaeodactylumTricornutum	Phaeodactylum_tricornutum	protozoa
252	PhytophthoraInfestans	Phytophthora_infestans	protozoa
253	PhytophthoraParasitica	Phytophthora_parasitica	protozoa
254	PhytophthoraRamorum	Phytophthora_ramorum	protozoa
255	PhytophthoraSojae	Phytophthora_sojae	protozoa
257	PlasmodiumBerghei	Plasmodium_berghei	protozoa
258	PlasmodiumChabaudi	Plasmodium_chabaudi	protozoa
261	PlasmodiumFalciparum	Plasmodium_falciparum	protozoa
265	PlasmodiumKnowlesi	Plasmodium_knowlesi	protozoa
269	PlasmodiumVivax	Plasmodium_vivax	protozoa
278	ThalassiosiraPseudonana	Thalassiosira_pseudonana	protozoa
280	ToxoplasmaGondii	Toxoplasma_gondii	protozoa
282	TrypanosomaBrucei	Trypanosoma_brucei	protozoa
283	AspergillusClavatus	Aspergillus_clavatus	fungi
284	AspergillusOryzae	Aspergillus_oryzae	fungi
285	AspergillusTerreus	Aspergillus_terreus	fungi
288	FusariumFujikuroi	Fusarium_fujikuroi	fungi
289	SchizosaccharomycesPombe	Schizosaccharomyces_pombe	fungi
292	VolvoxCarteri	Volvox_carteri	plant
294	None	Acropora_digitifera	invertebrate
295	None	Aedes_albopictus	invertebrate
296	None	Apis_cerana	invertebrate
297	None	Apis_dorsata	invertebrate
298	None	Apis_florea	invertebrate
299	None	Aplysia_californica	invertebrate
300	None	Bactrocera_dorsalis	invertebrate
301	None	Bactrocera_oleae	invertebrate
302	None	Bemisia_tabaci	invertebrate
303	None	Bicyclus_anynana	invertebrate
304	None	Branchiostoma_belcheri	invertebrate
305	None	Branchiostoma_floridae	invertebrate
306	None	Camponotus_floridanus	invertebrate
307	None	Ceratina_calcarata	invertebrate
308	None	Ceratitis_capitata	invertebrate
309	None	Ceratosolen_solmsi	invertebrate
310	None	Cimex_lectularius	invertebrate
311	None	Crassostrea_virginica	invertebrate
312	None	Cyphomyrmex_costatus	invertebrate
313	None	Drosophila_arizonae	invertebrate
314	None	Drosophila_biarmipes	invertebrate
315	None	Drosophila_bipectinata	invertebrate
316	None	Drosophila_busckii	invertebrate
317	None	Drosophila_elegans	invertebrate
318	None	Drosophila_eugracilis	invertebrate
319	None	Drosophila_ficusphila	invertebrate
320	None	Drosophila_kikkawai	invertebrate
321	None	Drosophila_miranda	invertebrate
322	None	Drosophila_navojoa	invertebrate
323	None	Drosophila_obscura	invertebrate
324	None	Drosophila_rhopaloa	invertebrate
325	None	Drosophila_serrata	invertebrate
326	None	Drosophila_suzukii	invertebrate
327	None	Drosophila_takahashii	invertebrate
328	None	Dufourea_novaeangliae	invertebrate
329	None	Echinococcus_granulosus	invertebrate
330	None	Eufriesea_mexicana	invertebrate
331	None	Eurytemora_affinis	invertebrate
332	None	Metaseiulus_occidentalis	invertebrate
333	None	Habropoda_laboriosa	invertebrate
334	None	Hydra_vulgaris	invertebrate
335	None	Limulus_polyphemus	invertebrate
336	None	Linepithema_humile	invertebrate
337	None	Mizuhopecten_yessoensis	invertebrate
338	None	Monomorium_pharaonis	invertebrate
339	None	Musca_domestica	invertebrate
340	None	Myzus_persicae	invertebrate
341	None	Nicrophorus_vespilloides	invertebrate
342	None	Nilaparvata_lugens	invertebrate
343	None	Onthophagus_taurus	invertebrate
344	None	Montastraea_faveolata	invertebrate
345	None	Orussus_abietinus	invertebrate
346	None	Papilio_machaon	invertebrate
347	None	Papilio_polytes	invertebrate
348	None	Papilio_xuthus	invertebrate
349	None	Parasteatoda_tepidariorum	invertebrate
350	None	Pieris_rapae	invertebrate
351	None	Pogonomyrmex_barbatus	invertebrate
352	None	Priapulus_caudatus	invertebrate
353	None	Pseudomyrmex_gracilis	invertebrate
354	None	Saccoglossus_kowalevskii	invertebrate
355	None	Stomoxys_calcitrans	invertebrate
356	None	Trachymyrmex_cornetzi	invertebrate
357	None	Trachymyrmex_septentrionalis	invertebrate
358	None	Trachymyrmex_zeteki	invertebrate
359	None	Varroa_destructor	invertebrate
360	None	Vollenhovia_emeryi	invertebrate
361	None	Wasmannia_auropunctata	invertebrate
362	None	Bactrocera_cucurbitae	invertebrate
363	None	Ananas_comosus	plant
364	None	Camelina_sativa	plant
365	None	Capsella_rubella	plant
366	None	Capsicum_annuum	plant
367	None	Carica_papaya	plant
368	None	Cicer_arietinum	plant
369	None	Citrus_clementina	plant
370	None	Citrus_sinensis	plant
371	None	Cucumis_melo	plant
372	None	Elaeis_guineensis	plant
373	None	Erythranthe_guttata	plant
374	None	Eucalyptus_grandis	plant
375	None	Eutrema_salsugineum	plant
376	None	Fragaria_vesca	plant
377	None	Gossypium_arboreum	plant
378	None	Gossypium_hirsutum	plant
379	None	Hevea_brasiliensis	plant
380	None	Ipomoea_nil	plant
381	None	Jatropha_curcas	plant
382	None	Juglans_regia	plant
383	None	Lactuca_sativa	plant
384	None	Malus_domestica	plant
385	None	Micromonas_pusilla	plant
386	None	Momordica_charantia	plant
387	None	Morus_notabilis	plant
388	None	Nelumbo_nucifera	plant
389	None	Nicotiana_sylvestris	plant
390	None	Nicotiana_tabacum	plant
391	None	Nicotiana_tomentosiformis	plant
392	None	Oryza_sativa	plant
393	None	Ostreococcus_tauri	plant
394	None	Phoenix_dactylifera	plant
395	None	Populus_euphratica	plant
396	None	Prunus_avium	plant
397	None	Prunus_mume	plant
398	None	Pyrus_x_bretschneideri	plant
399	None	Raphanus_sativus	plant
400	None	Ricinus_communis	plant
401	None	Sesamum_indicum	plant
402	None	Solanum_pennellii	plant
403	None	Spinacia_oleracea	plant
404	None	Tarenaya_hassleriana	plant
405	None	Vigna_radiata	plant
406	None	Acinonyx_jubatus	vertebrate
407	None	Balaenoptera_acutorostrata	vertebrate
408	None	Bison_bison	vertebrate
409	None	Bos_indicus	vertebrate
410	None	Bos_mutus	vertebrate
411	None	Bubalus_bubalis	vertebrate
412	None	Camelus_bactrianus	vertebrate
413	None	Camelus_dromedarius	vertebrate
414	None	Camelus_ferus	vertebrate
415	None	Castor_canadensis	vertebrate
416	None	Ceratotherium_simum	vertebrate
417	None	Chrysochloris_asiatica	vertebrate
418	None	Condylura_cristata	vertebrate
419	None	Echinops_telfairi	vertebrate
420	None	Elephantulus_edwardii	vertebrate
421	None	Eptesicus_fuscus	vertebrate
422	None	Equus_asinus	vertebrate
423	None	Equus_przewalskii	vertebrate
424	None	Erinaceus_europaeus	vertebrate
425	None	Hipposideros_armiger	vertebrate
426	None	Leptonychotes_weddellii	vertebrate
427	None	Lipotes_vexillifer	vertebrate
428	None	Manis_javanica	vertebrate
429	None	Marmota_marmota	vertebrate
430	None	Meriones_unguiculatus	vertebrate
431	None	Miniopterus_natalensis	vertebrate
433	None	Myotis_brandtii	vertebrate
434	None	Myotis_davidii	vertebrate
435	None	Monachus_monachus	vertebrate
436	None	Ochotona_princeps	vertebrate
437	None	Odobenus_rosmarus	vertebrate
438	None	Odocoileus_virginianus	vertebrate
439	None	Orcinus_orca	vertebrate
440	None	Orycteropus_afer	vertebrate
442	None	Pantholops_hodgsonii	vertebrate
444	None	Phascolarctos_cinereus	vertebrate
445	None	Physeter_catodon	vertebrate
446	None	Pongo_abelii	vertebrate
447	None	Pteropus_alecto	vertebrate
448	None	Pteropus_vampyrus	vertebrate
449	None	Rhinolophus_sinicus	vertebrate
450	None	Rousettus_aegyptiacus	vertebrate
452	None	Sorex_araneus	vertebrate
453	None	Trichechus_manatus	vertebrate
454	None	Tursiops_truncatus	vertebrate
455	None	Ursus_maritimus	vertebrate
456	None	Vicugna_pacos	vertebrate
457	None	Acanthisitta_chloris	vertebrate
458	None	Acanthochromis_polyacanthus	vertebrate
459	None	Alligator_mississippiensis	vertebrate
460	None	Alligator_sinensis	vertebrate
461	None	Anser_cygnoides	vertebrate
462	None	Caprimulgus_carolinensis	vertebrate
463	None	Apaloderma_vittatum	vertebrate
464	None	Aptenodytes_forsteri	vertebrate
465	None	Aquila_chrysaetos	vertebrate
466	None	Balearica_regulorum	vertebrate
467	None	Boleophthalmus_pectinirostris	vertebrate
468	None	Buceros_rhinoceros	vertebrate
469	None	Calidris_pugnax	vertebrate
470	None	Callorhinchus_milii	vertebrate
471	None	Calypte_anna	vertebrate
472	None	Cariama_cristata	vertebrate
473	None	Chaetura_pelagica	vertebrate
474	None	Charadrius_vociferus	vertebrate
475	None	Chelonia_mydas	vertebrate
476	None	Chlamydotis_macqueenii	vertebrate
477	None	Chrysemys_picta	vertebrate
478	None	Clupea_harengus	vertebrate
479	None	Colius_striatus	vertebrate
480	None	Columba_livia	vertebrate
481	None	Corvus_brachyrhynchos	vertebrate
482	None	Coturnix_japonica	vertebrate
483	None	Crocodylus_porosus	vertebrate
484	None	Cuculus_canorus	vertebrate
485	None	Cyprinodon_variegatus	vertebrate
486	None	Cyprinus_carpio	vertebrate
487	None	Egretta_garzetta	vertebrate
488	None	Esox_lucius	vertebrate
489	None	Eurypyga_helias	vertebrate
490	None	Falco_cherrug	vertebrate
491	None	Falco_peregrinus	vertebrate
492	None	Fulmarus_glacialis	vertebrate
493	None	Fundulus_heteroclitus	vertebrate
494	None	Gavia_stellata	vertebrate
495	None	Gavialis_gangeticus	vertebrate
496	None	Gekko_japonicus	vertebrate
497	None	Geospiza_fortis	vertebrate
498	None	Haliaeetus_albicilla	vertebrate
499	None	Haliaeetus_leucocephalus	vertebrate
500	None	Haplochromis_burtoni	vertebrate
501	None	Hippocampus_comes	vertebrate
502	None	Ictalurus_punctatus	vertebrate
503	None	Labrus_bergylta	vertebrate
504	None	Larimichthys_crocea	vertebrate
505	None	Lates_calcarifer	vertebrate
506	None	Lepidothrix_coronata	vertebrate
507	None	Leptosomus_discolor	vertebrate
508	None	Lonchura_striata	vertebrate
509	None	Manacus_vitellinus	vertebrate
510	None	Maylandia_zebra	vertebrate
511	None	Melopsittacus_undulatus	vertebrate
512	None	Merops_nubicus	vertebrate
513	None	Mesitornis_unicolor	vertebrate
514	None	Nanorana_parkeri	vertebrate
515	None	Neolamprologus_brichardi	vertebrate
516	None	Nestor_notabilis	vertebrate
517	None	Nipponia_nippon	vertebrate
518	None	Nothobranchius_furzeri	vertebrate
519	None	Notothenia_coriiceps	vertebrate
520	None	Numida_meleagris	vertebrate
521	None	Oncorhynchus_mykiss	vertebrate
522	None	Opisthocomus_hoazin	vertebrate
523	None	Parus_major	vertebrate
524	None	Pelecanus_crispus	vertebrate
525	None	Phaethon_lepturus	vertebrate
526	None	Phalacrocorax_carbo	vertebrate
527	None	Picoides_pubescens	vertebrate
528	None	Poecilia_mexicana	vertebrate
529	None	Pogona_vitticeps	vertebrate
530	None	Protobothrops_mucrosquamatus	vertebrate
531	None	Pseudopodoces_humilis	vertebrate
532	None	Pterocles_gutturalis	vertebrate
533	None	Pundamilia_nyererei	vertebrate
534	None	Pygocentrus_nattereri	vertebrate
535	None	Pygoscelis_adeliae	vertebrate
536	None	Salmo_salar	vertebrate
537	None	Scleropages_formosus	vertebrate
538	None	Serinus_canaria	vertebrate
539	None	Seriola_dumerili	vertebrate
540	None	Sinocyclocheilus_anshuiensis	vertebrate
541	None	Sinocyclocheilus_grahami	vertebrate
542	None	Sinocyclocheilus_rhinocerous	vertebrate
543	None	Stegastes_partitus	vertebrate
544	None	Struthio_camelus	vertebrate
545	None	Sturnus_vulgaris	vertebrate
546	None	Tauraco_erythrolophus	vertebrate
547	None	Thamnophis_sirtalis	vertebrate
548	None	Tyto_alba	vertebrate
549	None	Xenopus_laevis	vertebrate
550	None	Zonotrichia_albicollis	vertebrate
551	None	Ursus_arctos	vertebrate

## Sheet: Minus_protozoa
SpeciesUID	SpeciesName	NewickSpeciesName	Kingdom
3	AiluropodaMelanoleuca	Ailuropoda_melanoleuca	vertebrate
4	AnasPlatyrhynchos	Anas_platyrhynchos	vertebrate
5	AnolisCarolinensis	Anolis_carolinensis	vertebrate
6	AotusNancymaae	Aotus_nancymaae	vertebrate
8	CaenorhabditisElegans	Caenorhabditis_elegans	vertebrate
9	CallithrixJacchus	Callithrix_jacchus	vertebrate
10	CanisLupusFamiliaris	Canis_lupus	vertebrate
11	CapraHircus	Capra_hircus	vertebrate
12	CarlitoSyrichta	Carlito_syrichta	vertebrate
13	CaviaAperea	Cavia_aperea	vertebrate
14	CaviaPorcellus	Cavia_porcellus	vertebrate
15	CebusCapucinusImitator	Cebus_capucinus	vertebrate
16	CercocebusAtys	Cercocebus_atys	vertebrate
17	ChinchillaLanigera	Chinchilla_lanigera	vertebrate
18	ChlorocebusSabaeus	Chlorocebus_sabaeus	vertebrate
19	CionaIntestinalis	Ciona_intestinalis	vertebrate
20	ColobusAngolensisPalliatus	Colobus_angolensis	vertebrate
21	CricetulusGriseus	Cricetulus_griseus	vertebrate
22	CricetulusGriseus	Cricetulus_griseus	vertebrate
23	DanioRerio	Danio_rerio	vertebrate
24	DasypusNovemcinctus	Dasypus_novemcinctus	vertebrate
25	DipodomysOrdii	Dipodomys_ordii	vertebrate
26	DrosophilaMelanogaster	Drosophila_melanogaster	vertebrate
27	EptatretusBurgeri	Eptatretus_burgeri	vertebrate
28	EquusCaballus	Equus_caballus	vertebrate
29	FelisCatus	Felis_catus	vertebrate
30	FicedulaAlbicollis	Ficedula_albicollis	vertebrate
31	FukomysDamarensis	Fukomys_damarensis	vertebrate
32	GadusMorhua	Gadus_morhua	vertebrate
33	GallusGallus	Gallus_gallus	vertebrate
34	GasterosteusAculeatus	Gasterosteus_aculeatus	vertebrate
35	GorillaGorillaGorilla	Gorilla_gorilla	vertebrate
36	HeterocephalusGlaber	Heterocephalus_glaber	vertebrate
38	HomoSapiens	Homo_sapiens	vertebrate
39	IctidomysTridecemlineatus	Ictidomys_tridecemlineatus	vertebrate
40	JaculusJaculus	Jaculus_jaculus	vertebrate
41	LatimeriaChalumnae	Latimeria_chalumnae	vertebrate
42	LepisosteusOculatus	Lepisosteus_oculatus	vertebrate
43	LoxodontaAfricana	Loxodonta_africana	vertebrate
44	MacacaFascicularis	Macaca_fascicularis	vertebrate
45	MacacaMulatta	Macaca_mulatta	vertebrate
46	MacacaNemestrina	Macaca_nemestrina	vertebrate
47	MandrillusLeucophaeus	Mandrillus_leucophaeus	vertebrate
48	MeleagrisGallopavo	Meleagris_gallopavo	vertebrate
49	MesocricetusAuratus	Mesocricetus_auratus	vertebrate
50	MicrocebusMurinus	Microcebus_murinus	vertebrate
51	MicrotusOchrogaster	Microtus_ochrogaster	vertebrate
52	MonodelphisDomestica	Monodelphis_domestica	vertebrate
53	MusCaroli	Mus_caroli	vertebrate
54	MusMusculus	Mus_musculus	vertebrate
55	MusPahari	Mus_pahari	vertebrate
56	MusSpretus	Mus_spretus	vertebrate
57	MustelaPutoriusFuro	Mustela_putorius	vertebrate
58	MyotisLucifugus	Myotis_lucifugus	vertebrate
59	NannospalaxGalili	Nannospalax_galili	vertebrate
60	NomascusLeucogenys	Nomascus_leucogenys	vertebrate
61	OctodonDegus	Octodon_degus	vertebrate
62	OrnithorhynchusAnatinus	Ornithorhynchus_anatinus	vertebrate
63	OryctolagusCuniculus	Oryctolagus_cuniculus	vertebrate
64	OryziasLatipes	Oryzias_latipes	vertebrate
65	OtolemurGarnettii	Otolemur_garnettii	vertebrate
66	OvisAries	Ovis_aries	vertebrate
67	PanPaniscus	Pan_paniscus	vertebrate
68	PanTroglodytes	Pan_troglodytes	vertebrate
69	PantheraPardus	Panthera_pardus	vertebrate
70	PantheraTigrisAltaica	Panthera_tigris	vertebrate
71	PapioAnubis	Papio_anubis	vertebrate
72	PelodiscusSinensis	Pelodiscus_sinensis	vertebrate
73	PeromyscusManiculatusBairdii	Peromyscus_maniculatus	vertebrate
74	PetromyzonMarinus	Petromyzon_marinus	vertebrate
75	PropithecusCoquereli	Propithecus_coquereli	vertebrate
76	RattusNorvegicus	Rattus_norvegicus	vertebrate
77	RhinopithecusBieti	Rhinopithecus_bieti	vertebrate
78	RhinopithecusRoxellana	Rhinopithecus_roxellana	vertebrate
79	SaccharomycesCerevisiae	Saccharomyces_cerevisiae	vertebrate
80	SaimiriBoliviensisBoliviensis	Saimiri_boliviensis	vertebrate
81	SarcophilusHarrisii	Sarcophilus_harrisii	vertebrate
82	SusScrofa	Sus_scrofa	vertebrate
83	TaeniopygiaGuttata	Taeniopygia_guttata	vertebrate
84	TakifuguRubripes	Takifugu_rubripes	vertebrate
85	TetraodonNigroviridis	Tetraodon_nigroviridis	vertebrate
86	XenopusTropicalis	Xenopus_tropicalis	vertebrate
87	XiphophorusMaculatus	Xiphophorus_maculatus	vertebrate
135	AegilopsTauschii	Aegilops_tauschii	plant
136	AmborellaTrichopoda	Amborella_trichopoda	plant
137	ArabidopsisLyrata	Arabidopsis_lyrata	plant
138	ArabidopsisThaliana	Arabidopsis_thaliana	plant
139	BetaVulgaris	Beta_vulgaris	plant
140	BrachypodiumDistachyon	Brachypodium_distachyon	plant
141	BrassicaNapus	Brassica_napus	plant
142	BrassicaOleracea	Brassica_oleracea	plant
143	BrassicaRapa	Brassica_rapa	plant
145	ChlamydomonasReinhardtii	Chlamydomonas_reinhardtii	plant
146	ChondrusCrispus	Chondrus_crispus	plant
147	CucumisSativus	Cucumis_sativus	plant
148	CyanidioschyzonMerolae	Cyanidioschyzon_merolae	plant
149	DaucusCarota	Daucus_carota	plant
150	GaldieriaSulphuraria	Galdieria_sulphuraria	plant
151	GlycineMax	Glycine_max	plant
152	GossypiumRaimondii	Gossypium_raimondii	plant
153	HelianthusAnnuus	Helianthus_annuus	plant
154	HordeumVulgare	Hordeum_vulgare	plant
155	LupinusAngustifolius	Lupinus_angustifolius	plant
156	ManihotEsculenta	Manihot_esculenta	plant
157	MedicagoTruncatula	Medicago_truncatula	plant
158	MusaAcuminata	Musa_acuminata	plant
159	OryzaBarthii	Oryza_barthii	plant
160	OryzaBrachyantha	Oryza_brachyantha	plant
161	OryzaGlaberrima	Oryza_glaberrima	plant
163	OryzaMeridionalis	Oryza_meridionalis	plant
164	OryzaPunctata	Oryza_punctata	plant
165	OryzaRufipogon	Oryza_rufipogon	plant
166	OstreococcusLucimarinus	Ostreococcus_lucimarinus	plant
167	PhaseolusVulgaris	Phaseolus_vulgaris	plant
168	PhyscomitrellaPatens	Physcomitrella_patens	plant
169	PopulusTrichocarpa	Populus_trichocarpa	plant
170	PrunusPersica	Prunus_persica	plant
171	SelaginellaMoellendorffii	Selaginella_moellendorffii	plant
173	SolanumTuberosum	Solanum_tuberosum	plant
174	SorghumBicolor	Sorghum_bicolor	plant
175	TheobromaCacao	Theobroma_cacao	plant
176	TrifoliumPratense	Trifolium_pratense	plant
177	TriticumAestivum	Triticum_aestivum	plant
178	TriticumUrartu	Triticum_urartu	plant
179	VitisVinifera	Vitis_vinifera	plant
180	ZeaMays	Zea_mays	plant
181	AcyrthosiphonPisum	Acyrthosiphon_pisum	invertebrate
182	AedesAegypti	Aedes_aegypti	invertebrate
183	AmphimedonQueenslandica	Amphimedon_queenslandica	invertebrate
184	AnophelesDarlingi	Anopheles_darlingi	invertebrate
185	AnophelesGambiae	Anopheles_gambiae	invertebrate
186	ApisMellifera	Apis_mellifera	invertebrate
187	AttaCephalotes	Atta_cephalotes	invertebrate
188	BelgicaAntarctica	Belgica_antarctica	invertebrate
189	BombyxMori	Bombyx_mori	invertebrate
190	BrugiaMalayi	Brugia_malayi	invertebrate
191	CaenorhabditisBrenneri	Caenorhabditis_brenneri	invertebrate
192	CaenorhabditisBriggsae	Caenorhabditis_briggsae	invertebrate
194	CaenorhabditisJaponica	Caenorhabditis_japonica	invertebrate
195	CaenorhabditisRemanei	Caenorhabditis_remanei	invertebrate
196	CapitellaTeleta	Capitella_teleta	invertebrate
197	CrassostreaGigas	Crassostrea_gigas	invertebrate
198	CulexQuinquefasciatus	Culex_quinquefasciatus	invertebrate
199	DanausPlexippus	Danaus_plexippus	invertebrate
200	DaphniaPulex	Daphnia_pulex	invertebrate
201	DendroctonusPonderosae	Dendroctonus_ponderosae	invertebrate
202	DrosophilaAnanassae	Drosophila_ananassae	invertebrate
203	DrosophilaErecta	Drosophila_erecta	invertebrate
204	DrosophilaGrimshawi	Drosophila_grimshawi	invertebrate
206	DrosophilaMojavensis	Drosophila_mojavensis	invertebrate
207	DrosophilaPersimilis	Drosophila_persimilis	invertebrate
208	DrosophilaPseudoobscura	Drosophila_pseudoobscura	invertebrate
209	DrosophilaSechellia	Drosophila_sechellia	invertebrate
210	DrosophilaSimulans	Drosophila_simulans	invertebrate
211	DrosophilaVirilis	Drosophila_virilis	invertebrate
212	DrosophilaWillistoni	Drosophila_willistoni	invertebrate
213	DrosophilaYakuba	Drosophila_yakuba	invertebrate
214	HeliconiusMelpomene	Heliconius_melpomene	invertebrate
215	HelobdellaRobusta	Helobdella_robusta	invertebrate
216	LepeophtheirusSalmonis	Lepeophtheirus_salmonis	invertebrate
217	LuciliaCuprina	Lucilia_cuprina	invertebrate
218	MayetiolaDestructor	Mayetiola_destructor	invertebrate
219	MelitaeaCinxia	Melitaea_cinxia	invertebrate
220	MnemiopsisLeidyi	Mnemiopsis_leidyi	invertebrate
221	NematostellaVectensis	Nematostella_vectensis	invertebrate
222	OctopusBimaculoides	Octopus_bimaculoides	invertebrate
223	PediculusHumanus	Pediculus_humanus	invertebrate
224	PristionchusPacificus	Pristionchus_pacificus	invertebrate
225	RhodniusProlixus	Rhodnius_prolixus	invertebrate
226	SolenopsisInvicta	Solenopsis_invicta	invertebrate
227	StegodyphusMimosarum	Stegodyphus_mimosarum	invertebrate
228	StrigamiaMaritima	Strigamia_maritima	invertebrate
229	TriboliumCastaneum	Tribolium_castaneum	invertebrate
230	TrichoplaxAdhaerens	Trichoplax_adhaerens	invertebrate
231	ZootermopsisNevadensis	Zootermopsis_nevadensis	invertebrate
283	AspergillusClavatus	Aspergillus_clavatus	fungi
284	AspergillusOryzae	Aspergillus_oryzae	fungi
285	AspergillusTerreus	Aspergillus_terreus	fungi
288	FusariumFujikuroi	Fusarium_fujikuroi	fungi
289	SchizosaccharomycesPombe	Schizosaccharomyces_pombe	fungi
292	VolvoxCarteri	Volvox_carteri	plant
294	None	Acropora_digitifera	invertebrate
295	None	Aedes_albopictus	invertebrate
296	None	Apis_cerana	invertebrate
297	None	Apis_dorsata	invertebrate
298	None	Apis_florea	invertebrate
299	None	Aplysia_californica	invertebrate
300	None	Bactrocera_dorsalis	invertebrate
301	None	Bactrocera_oleae	invertebrate
302	None	Bemisia_tabaci	invertebrate
303	None	Bicyclus_anynana	invertebrate
304	None	Branchiostoma_belcheri	invertebrate
305	None	Branchiostoma_floridae	invertebrate
306	None	Camponotus_floridanus	invertebrate
307	None	Ceratina_calcarata	invertebrate
308	None	Ceratitis_capitata	invertebrate
309	None	Ceratosolen_solmsi	invertebrate
310	None	Cimex_lectularius	invertebrate
311	None	Crassostrea_virginica	invertebrate
312	None	Cyphomyrmex_costatus	invertebrate
313	None	Drosophila_arizonae	invertebrate
314	None	Drosophila_biarmipes	invertebrate
315	None	Drosophila_bipectinata	invertebrate
316	None	Drosophila_busckii	invertebrate
317	None	Drosophila_elegans	invertebrate
318	None	Drosophila_eugracilis	invertebrate
319	None	Drosophila_ficusphila	invertebrate
320	None	Drosophila_kikkawai	invertebrate
321	None	Drosophila_miranda	invertebrate
322	None	Drosophila_navojoa	invertebrate
323	None	Drosophila_obscura	invertebrate
324	None	Drosophila_rhopaloa	invertebrate
325	None	Drosophila_serrata	invertebrate
326	None	Drosophila_suzukii	invertebrate
327	None	Drosophila_takahashii	invertebrate
328	None	Dufourea_novaeangliae	invertebrate
329	None	Echinococcus_granulosus	invertebrate
330	None	Eufriesea_mexicana	invertebrate
331	None	Eurytemora_affinis	invertebrate
332	None	Metaseiulus_occidentalis	invertebrate
333	None	Habropoda_laboriosa	invertebrate
334	None	Hydra_vulgaris	invertebrate
335	None	Limulus_polyphemus	invertebrate
336	None	Linepithema_humile	invertebrate
337	None	Mizuhopecten_yessoensis	invertebrate
338	None	Monomorium_pharaonis	invertebrate
339	None	Musca_domestica	invertebrate
340	None	Myzus_persicae	invertebrate
341	None	Nicrophorus_vespilloides	invertebrate
342	None	Nilaparvata_lugens	invertebrate
343	None	Onthophagus_taurus	invertebrate
344	None	Montastraea_faveolata	invertebrate
345	None	Orussus_abietinus	invertebrate
346	None	Papilio_machaon	invertebrate
347	None	Papilio_polytes	invertebrate
348	None	Papilio_xuthus	invertebrate
349	None	Parasteatoda_tepidariorum	invertebrate
350	None	Pieris_rapae	invertebrate
351	None	Pogonomyrmex_barbatus	invertebrate
352	None	Priapulus_caudatus	invertebrate
353	None	Pseudomyrmex_gracilis	invertebrate
354	None	Saccoglossus_kowalevskii	invertebrate
355	None	Stomoxys_calcitrans	invertebrate
356	None	Trachymyrmex_cornetzi	invertebrate
357	None	Trachymyrmex_septentrionalis	invertebrate
358	None	Trachymyrmex_zeteki	invertebrate
359	None	Varroa_destructor	invertebrate
360	None	Vollenhovia_emeryi	invertebrate
361	None	Wasmannia_auropunctata	invertebrate
362	None	Bactrocera_cucurbitae	invertebrate
363	None	Ananas_comosus	plant
364	None	Camelina_sativa	plant
365	None	Capsella_rubella	plant
366	None	Capsicum_annuum	plant
367	None	Carica_papaya	plant
368	None	Cicer_arietinum	plant
369	None	Citrus_clementina	plant
370	None	Citrus_sinensis	plant
371	None	Cucumis_melo	plant
372	None	Elaeis_guineensis	plant
373	None	Erythranthe_guttata	plant
374	None	Eucalyptus_grandis	plant
375	None	Eutrema_salsugineum	plant
376	None	Fragaria_vesca	plant
377	None	Gossypium_arboreum	plant
378	None	Gossypium_hirsutum	plant
379	None	Hevea_brasiliensis	plant
380	None	Ipomoea_nil	plant
381	None	Jatropha_curcas	plant
382	None	Juglans_regia	plant
383	None	Lactuca_sativa	plant
384	None	Malus_domestica	plant
385	None	Micromonas_pusilla	plant
386	None	Momordica_charantia	plant
387	None	Morus_notabilis	plant
388	None	Nelumbo_nucifera	plant
389	None	Nicotiana_sylvestris	plant
390	None	Nicotiana_tabacum	plant
391	None	Nicotiana_tomentosiformis	plant
392	None	Oryza_sativa	plant
393	None	Ostreococcus_tauri	plant
394	None	Phoenix_dactylifera	plant
395	None	Populus_euphratica	plant
396	None	Prunus_avium	plant
397	None	Prunus_mume	plant
398	None	Pyrus_x_bretschneideri	plant
399	None	Raphanus_sativus	plant
400	None	Ricinus_communis	plant
401	None	Sesamum_indicum	plant
402	None	Solanum_pennellii	plant
403	None	Spinacia_oleracea	plant
404	None	Tarenaya_hassleriana	plant
405	None	Vigna_radiata	plant
406	None	Acinonyx_jubatus	vertebrate
407	None	Balaenoptera_acutorostrata	vertebrate
408	None	Bison_bison	vertebrate
409	None	Bos_indicus	vertebrate
410	None	Bos_mutus	vertebrate
411	None	Bubalus_bubalis	vertebrate
412	None	Camelus_bactrianus	vertebrate
413	None	Camelus_dromedarius	vertebrate
414	None	Camelus_ferus	vertebrate
415	None	Castor_canadensis	vertebrate
416	None	Ceratotherium_simum	vertebrate
417	None	Chrysochloris_asiatica	vertebrate
418	None	Condylura_cristata	vertebrate
419	None	Echinops_telfairi	vertebrate
420	None	Elephantulus_edwardii	vertebrate
421	None	Eptesicus_fuscus	vertebrate
422	None	Equus_asinus	vertebrate
423	None	Equus_przewalskii	vertebrate
424	None	Erinaceus_europaeus	vertebrate
425	None	Hipposideros_armiger	vertebrate
426	None	Leptonychotes_weddellii	vertebrate
427	None	Lipotes_vexillifer	vertebrate
428	None	Manis_javanica	vertebrate
429	None	Marmota_marmota	vertebrate
430	None	Meriones_unguiculatus	vertebrate
431	None	Miniopterus_natalensis	vertebrate
433	None	Myotis_brandtii	vertebrate
434	None	Myotis_davidii	vertebrate
435	None	Monachus_monachus	vertebrate
436	None	Ochotona_princeps	vertebrate
437	None	Odobenus_rosmarus	vertebrate
438	None	Odocoileus_virginianus	vertebrate
439	None	Orcinus_orca	vertebrate
440	None	Orycteropus_afer	vertebrate
442	None	Pantholops_hodgsonii	vertebrate
444	None	Phascolarctos_cinereus	vertebrate
445	None	Physeter_catodon	vertebrate
446	None	Pongo_abelii	vertebrate
447	None	Pteropus_alecto	vertebrate
448	None	Pteropus_vampyrus	vertebrate
449	None	Rhinolophus_sinicus	vertebrate
450	None	Rousettus_aegyptiacus	vertebrate
452	None	Sorex_araneus	vertebrate
453	None	Trichechus_manatus	vertebrate
454	None	Tursiops_truncatus	vertebrate
455	None	Ursus_maritimus	vertebrate
456	None	Vicugna_pacos	vertebrate
457	None	Acanthisitta_chloris	vertebrate
458	None	Acanthochromis_polyacanthus	vertebrate
459	None	Alligator_mississippiensis	vertebrate
460	None	Alligator_sinensis	vertebrate
461	None	Anser_cygnoides	vertebrate
462	None	Caprimulgus_carolinensis	vertebrate
463	None	Apaloderma_vittatum	vertebrate
464	None	Aptenodytes_forsteri	vertebrate
465	None	Aquila_chrysaetos	vertebrate
466	None	Balearica_regulorum	vertebrate
467	None	Boleophthalmus_pectinirostris	vertebrate
468	None	Buceros_rhinoceros	vertebrate
469	None	Calidris_pugnax	vertebrate
470	None	Callorhinchus_milii	vertebrate
471	None	Calypte_anna	vertebrate
472	None	Cariama_cristata	vertebrate
473	None	Chaetura_pelagica	vertebrate
474	None	Charadrius_vociferus	vertebrate
475	None	Chelonia_mydas	vertebrate
476	None	Chlamydotis_macqueenii	vertebrate
477	None	Chrysemys_picta	vertebrate
478	None	Clupea_harengus	vertebrate
479	None	Colius_striatus	vertebrate
480	None	Columba_livia	vertebrate
481	None	Corvus_brachyrhynchos	vertebrate
482	None	Coturnix_japonica	vertebrate
483	None	Crocodylus_porosus	vertebrate
484	None	Cuculus_canorus	vertebrate
485	None	Cyprinodon_variegatus	vertebrate
486	None	Cyprinus_carpio	vertebrate
487	None	Egretta_garzetta	vertebrate
488	None	Esox_lucius	vertebrate
489	None	Eurypyga_helias	vertebrate
490	None	Falco_cherrug	vertebrate
491	None	Falco_peregrinus	vertebrate
492	None	Fulmarus_glacialis	vertebrate
493	None	Fundulus_heteroclitus	vertebrate
494	None	Gavia_stellata	vertebrate
495	None	Gavialis_gangeticus	vertebrate
496	None	Gekko_japonicus	vertebrate
497	None	Geospiza_fortis	vertebrate
498	None	Haliaeetus_albicilla	vertebrate
499	None	Haliaeetus_leucocephalus	vertebrate
500	None	Haplochromis_burtoni	vertebrate
501	None	Hippocampus_comes	vertebrate
502	None	Ictalurus_punctatus	vertebrate
503	None	Labrus_bergylta	vertebrate
504	None	Larimichthys_crocea	vertebrate
505	None	Lates_calcarifer	vertebrate
506	None	Lepidothrix_coronata	vertebrate
507	None	Leptosomus_discolor	vertebrate
508	None	Lonchura_striata	vertebrate
509	None	Manacus_vitellinus	vertebrate
510	None	Maylandia_zebra	vertebrate
511	None	Melopsittacus_undulatus	vertebrate
512	None	Merops_nubicus	vertebrate
513	None	Mesitornis_unicolor	vertebrate
514	None	Nanorana_parkeri	vertebrate
515	None	Neolamprologus_brichardi	vertebrate
516	None	Nestor_notabilis	vertebrate
517	None	Nipponia_nippon	vertebrate
518	None	Nothobranchius_furzeri	vertebrate
519	None	Notothenia_coriiceps	vertebrate
520	None	Numida_meleagris	vertebrate
521	None	Oncorhynchus_mykiss	vertebrate
522	None	Opisthocomus_hoazin	vertebrate
523	None	Parus_major	vertebrate
524	None	Pelecanus_crispus	vertebrate
525	None	Phaethon_lepturus	vertebrate
526	None	Phalacrocorax_carbo	vertebrate
527	None	Picoides_pubescens	vertebrate
528	None	Poecilia_mexicana	vertebrate
529	None	Pogona_vitticeps	vertebrate
530	None	Protobothrops_mucrosquamatus	vertebrate
531	None	Pseudopodoces_humilis	vertebrate
532	None	Pterocles_gutturalis	vertebrate
533	None	Pundamilia_nyererei	vertebrate
534	None	Pygocentrus_nattereri	vertebrate
535	None	Pygoscelis_adeliae	vertebrate
536	None	Salmo_salar	vertebrate
537	None	Scleropages_formosus	vertebrate
538	None	Serinus_canaria	vertebrate
539	None	Seriola_dumerili	vertebrate
540	None	Sinocyclocheilus_anshuiensis	vertebrate
541	None	Sinocyclocheilus_grahami	vertebrate
542	None	Sinocyclocheilus_rhinocerous	vertebrate
543	None	Stegastes_partitus	vertebrate
544	None	Struthio_camelus	vertebrate
545	None	Sturnus_vulgaris	vertebrate
546	None	Tauraco_erythrolophus	vertebrate
547	None	Thamnophis_sirtalis	vertebrate
548	None	Tyto_alba	vertebrate
549	None	Xenopus_laevis	vertebrate
550	None	Zonotrichia_albicollis	vertebrate
551	None	Ursus_arctos	vertebrate
