# Supplementary figures and images for: Universal and taxon-specific trends in protein sequences as a function of age
Source: eLife journal article supplement (doi:10.7554/elife.57347), 2021-01-08

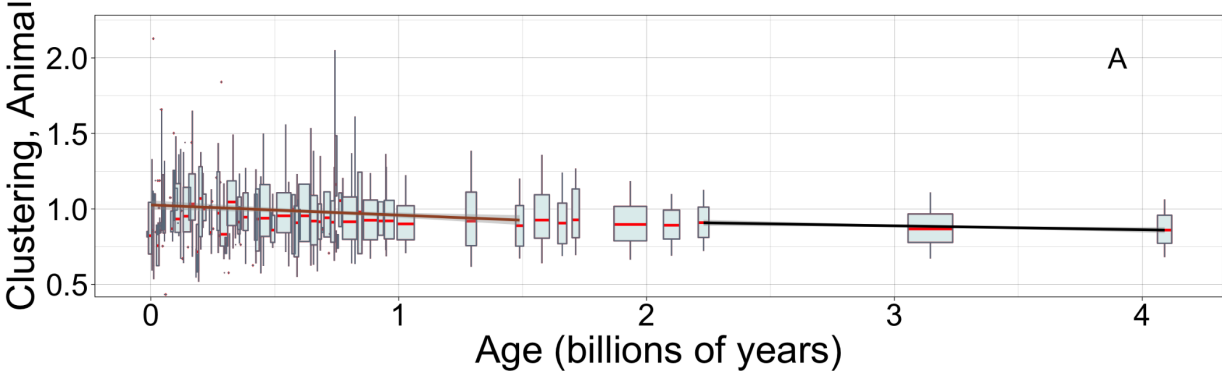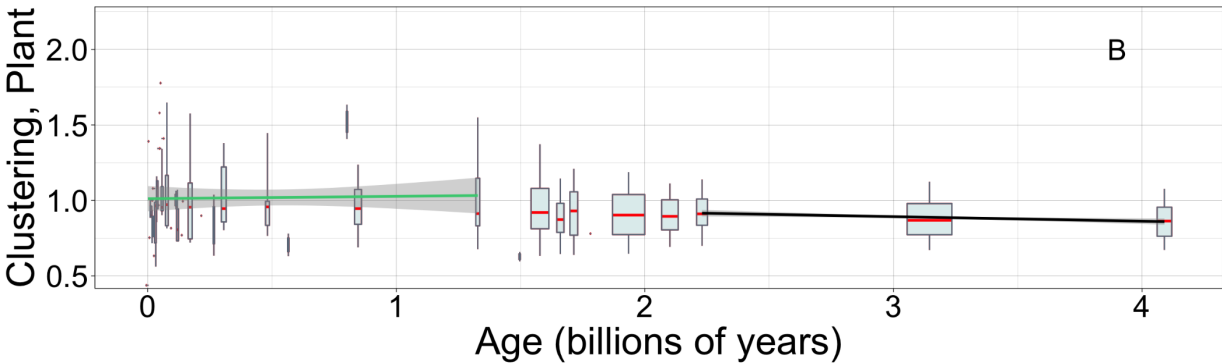

Supplement: supp [file elife-57347-supp-v1.zip]

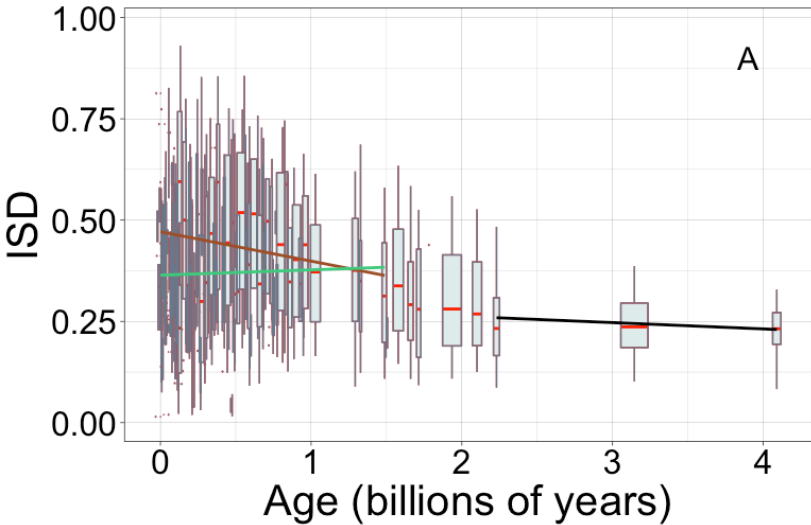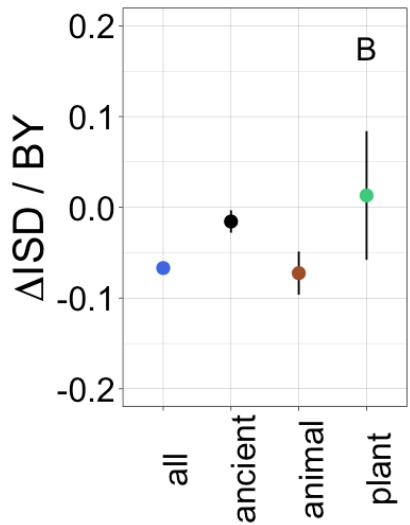

Supplement: supp [file elife-57347-supp-v1.zip]

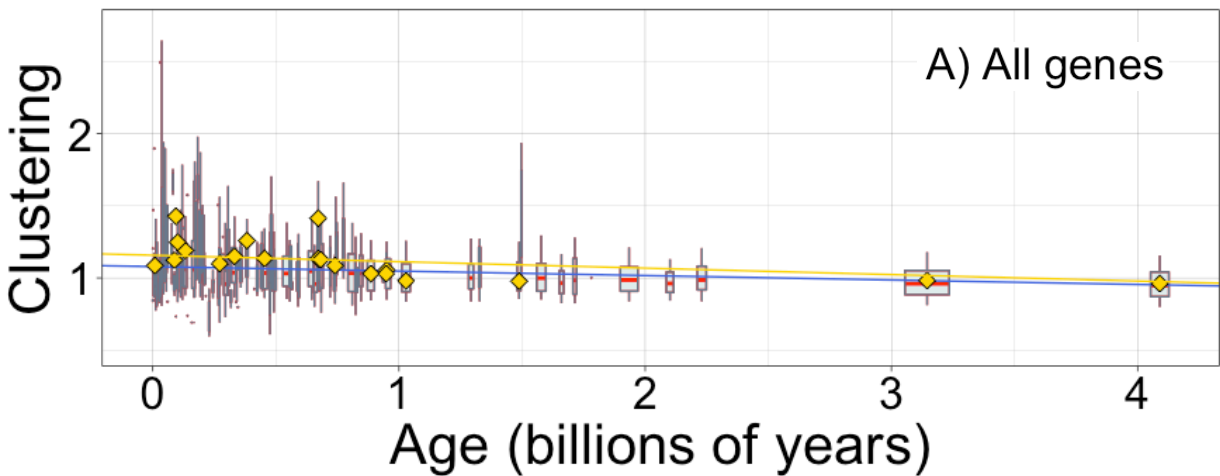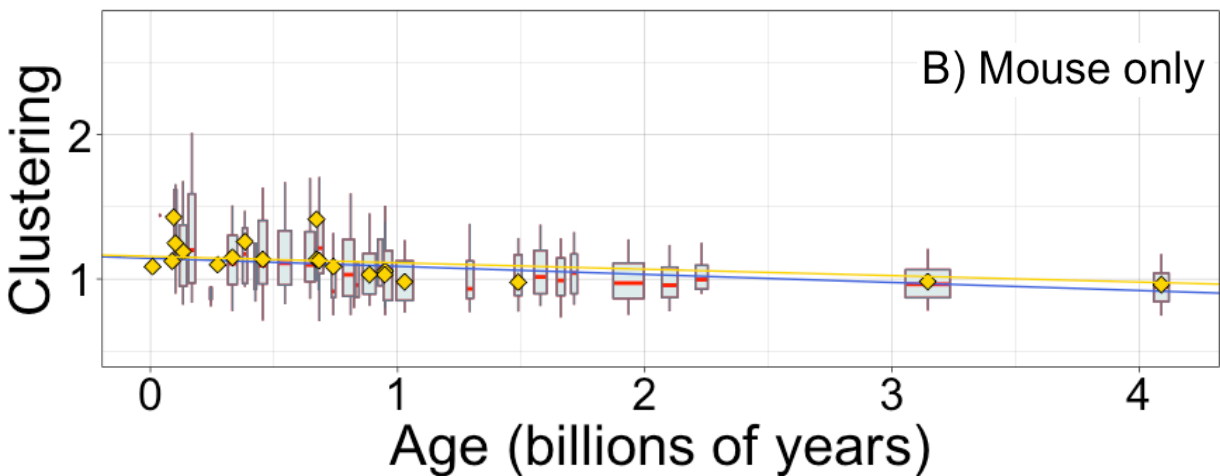

Supplement: supp [file elife-57347-supp-v1.zip]

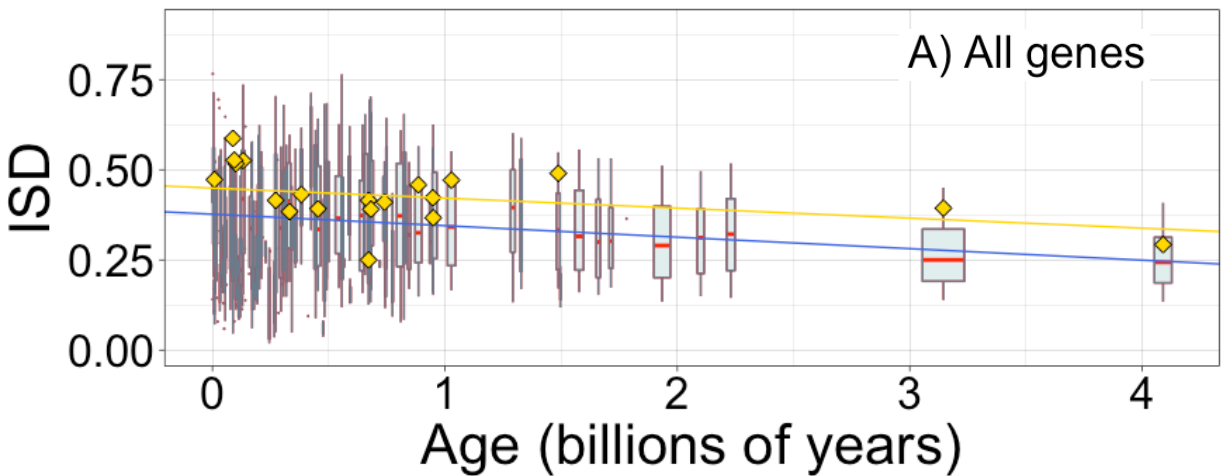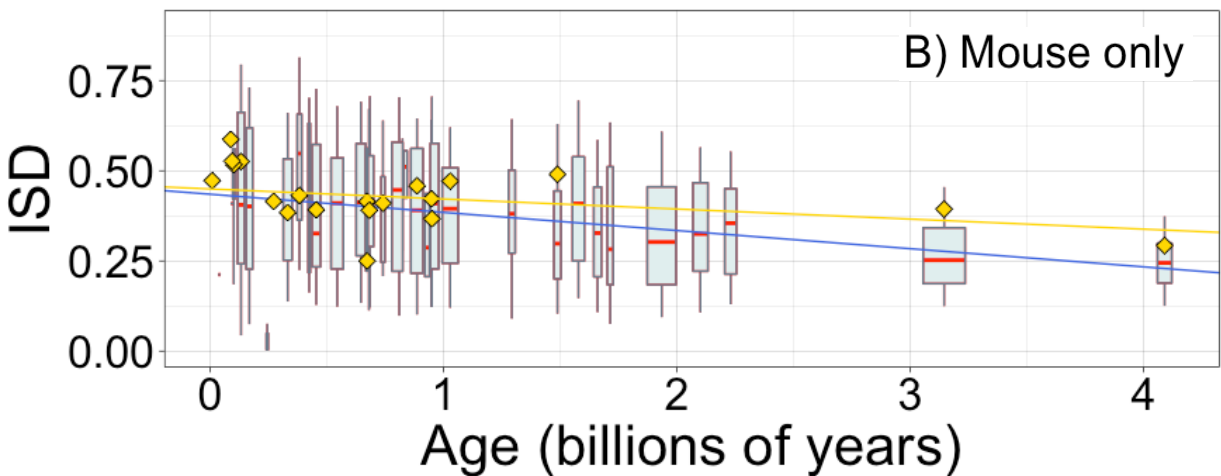

Supplement: supp [file elife-57347-supp-v1.zip]

Nontransmembrane

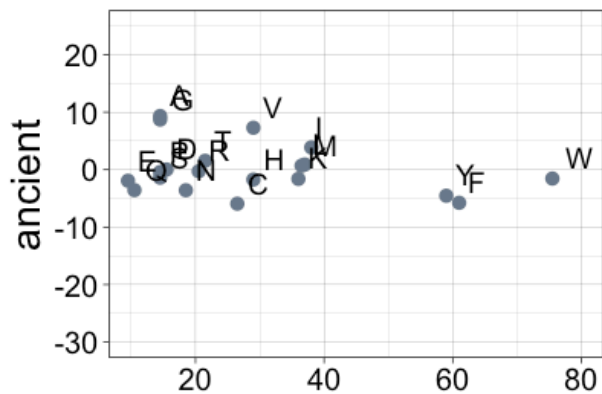

Transmembrane

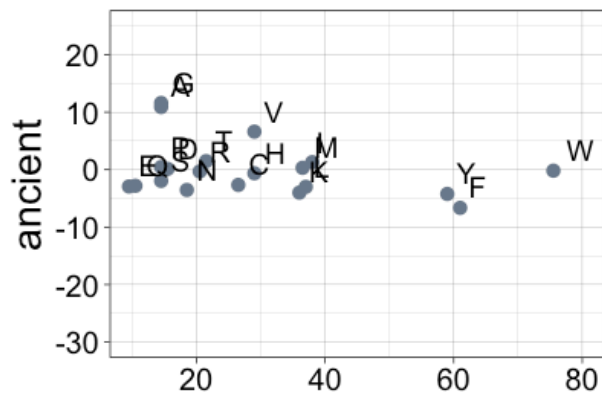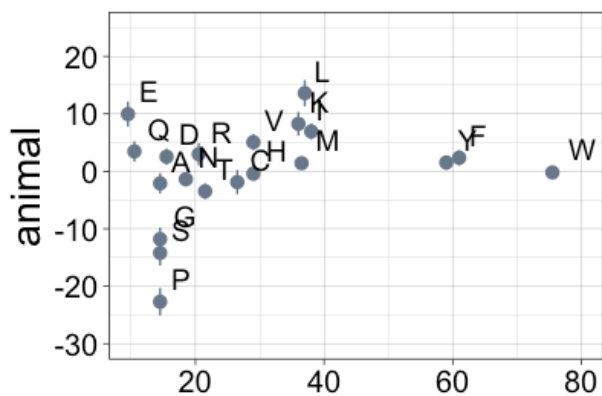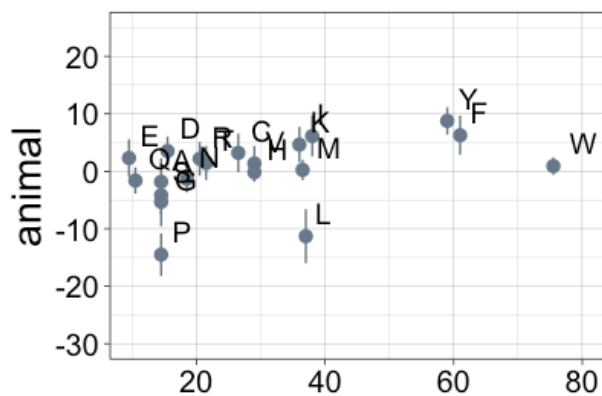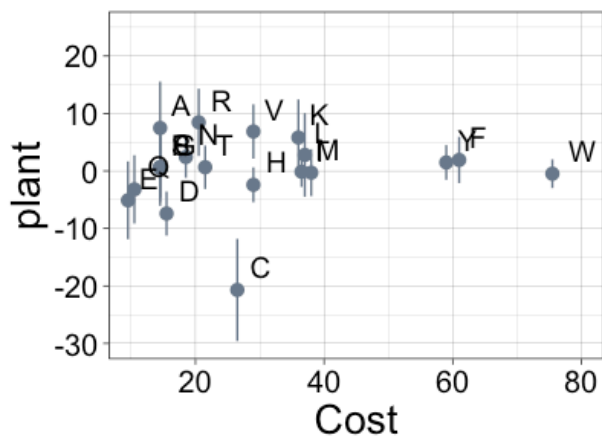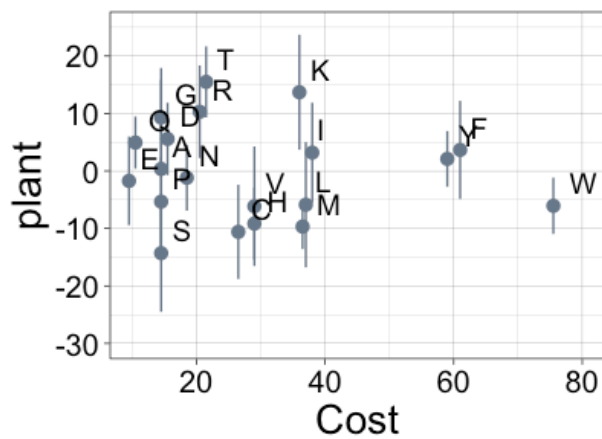

Supplement: supp [file elife-57347-supp-v1.zip]

# Nontransmembrane

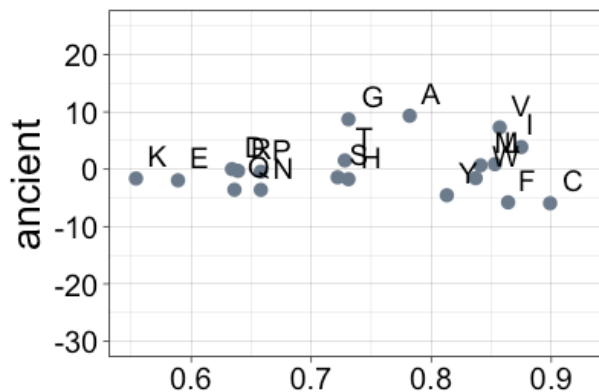

# Transmembrane

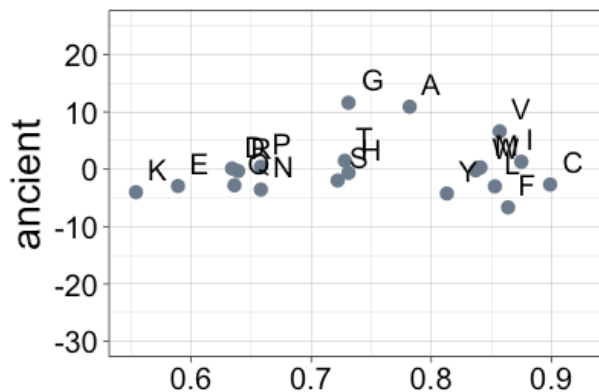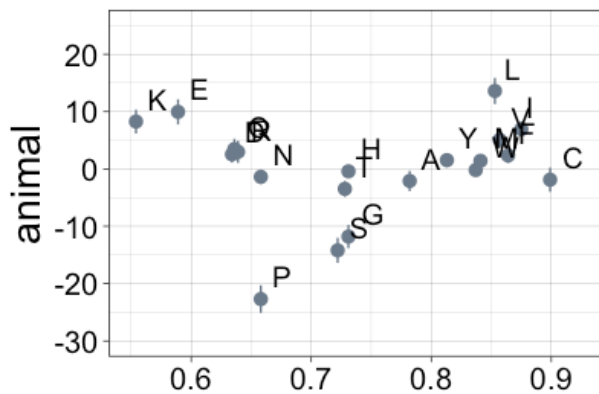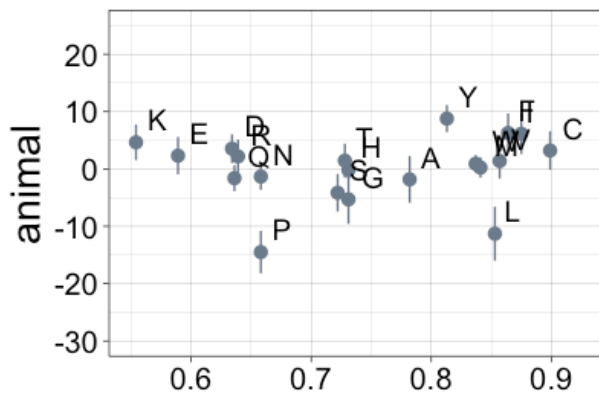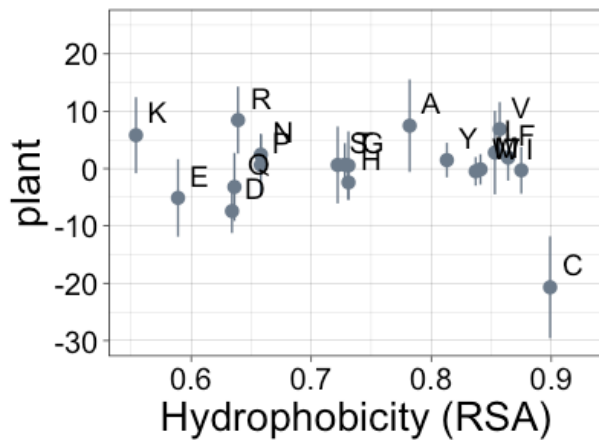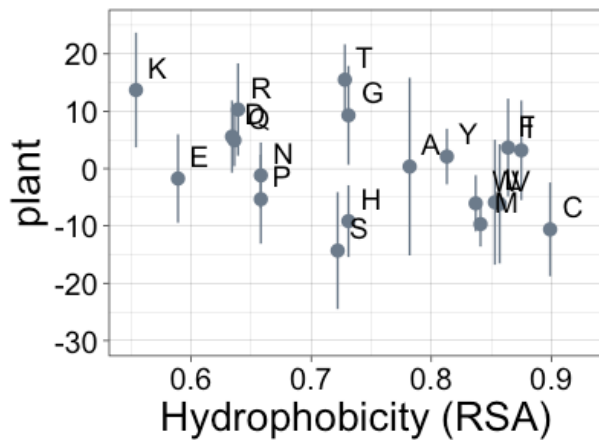

Supplement: supp [file elife-57347-supp-v1.zip]

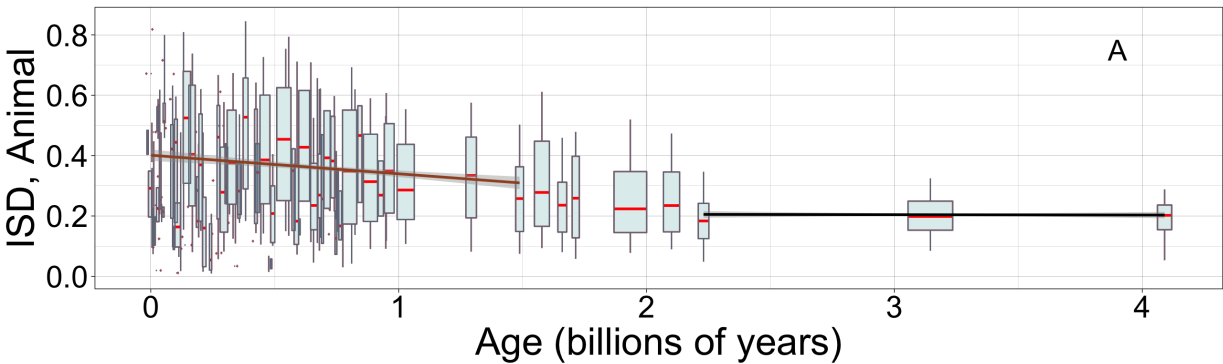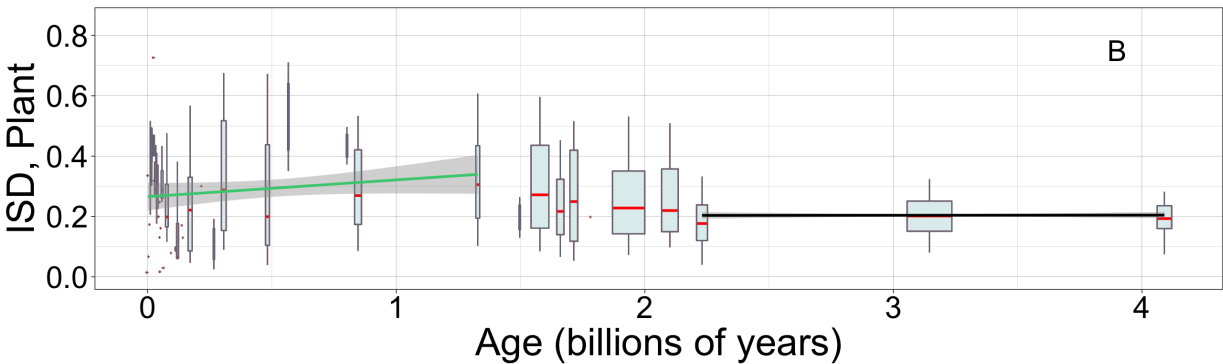

Supplement: supp [file elife-57347-supp-v1.zip]

# Nontransmembrane

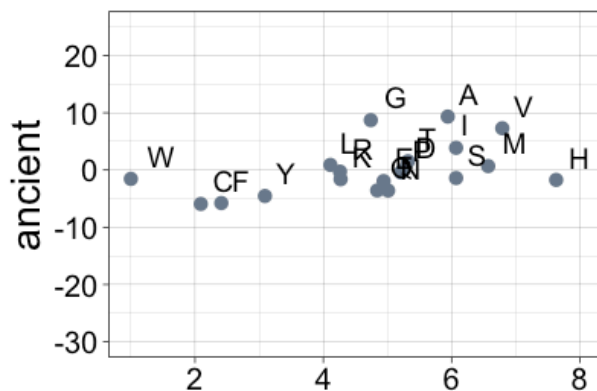

# Transmembrane

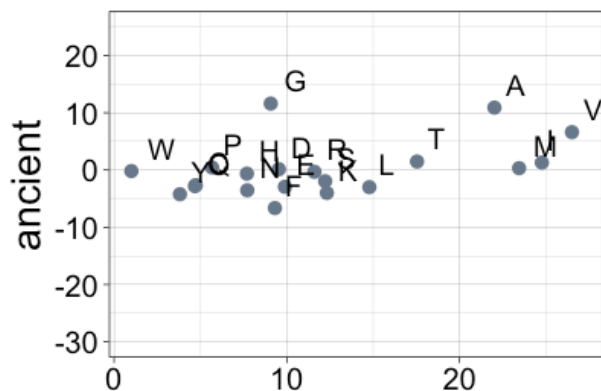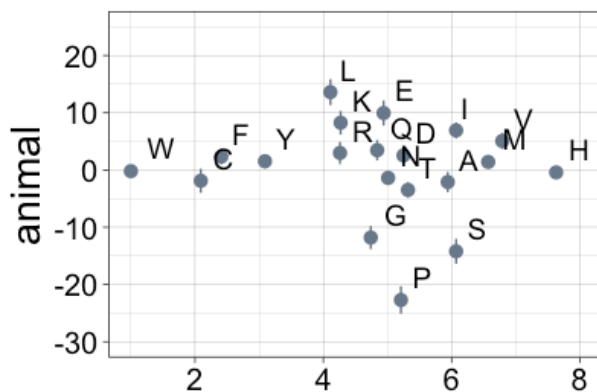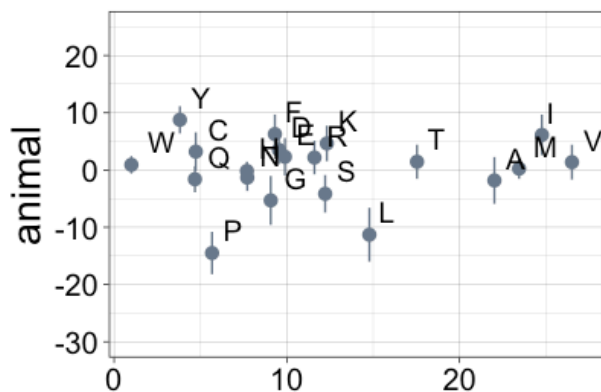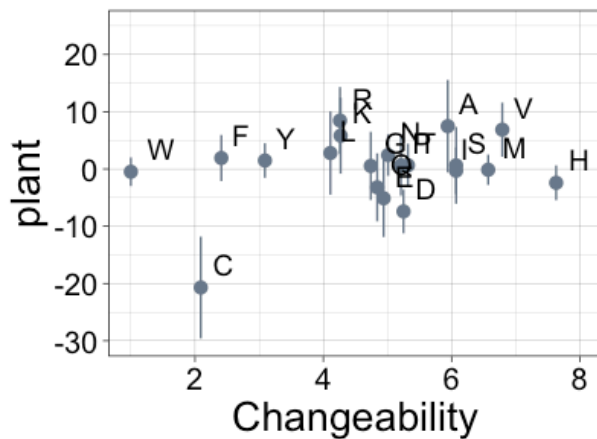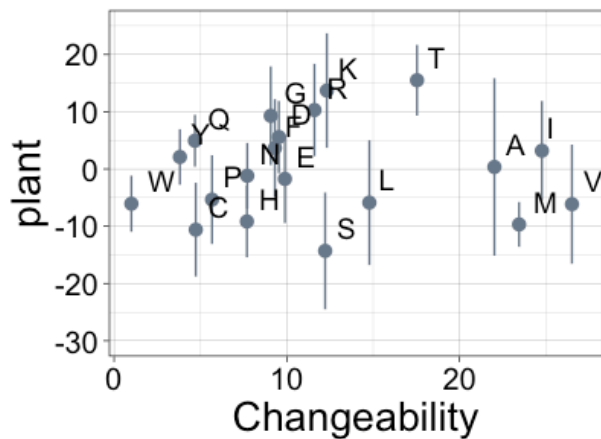

Supplement: supp [file elife-57347-supp-v1.zip]

## Nontransmembrane

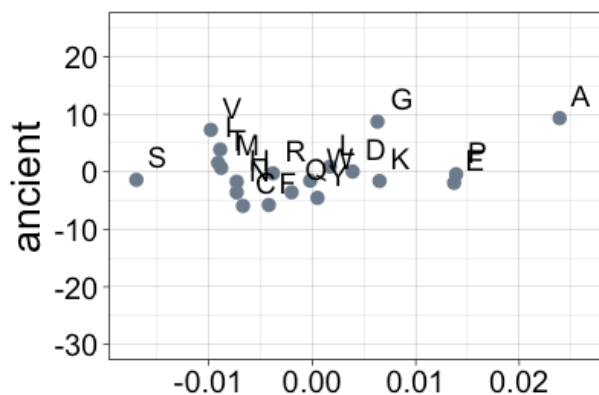

## Transmembrane

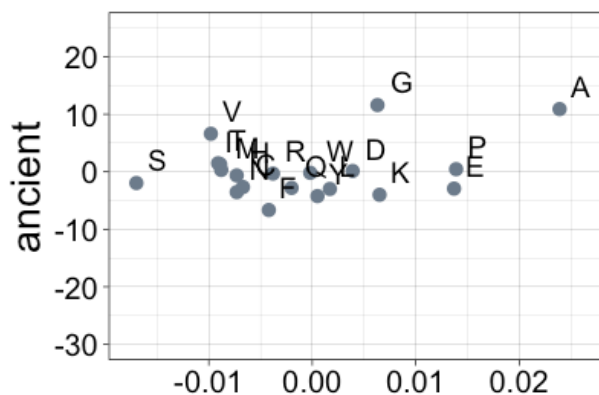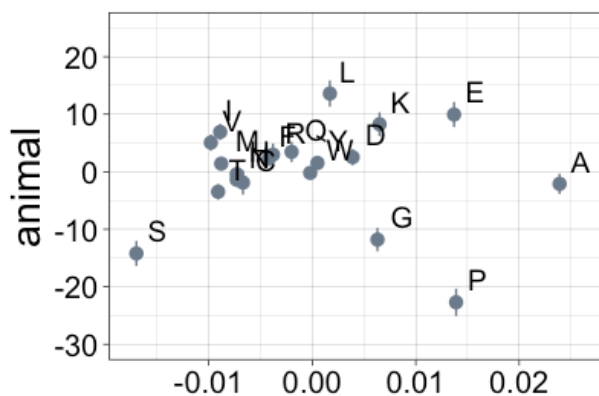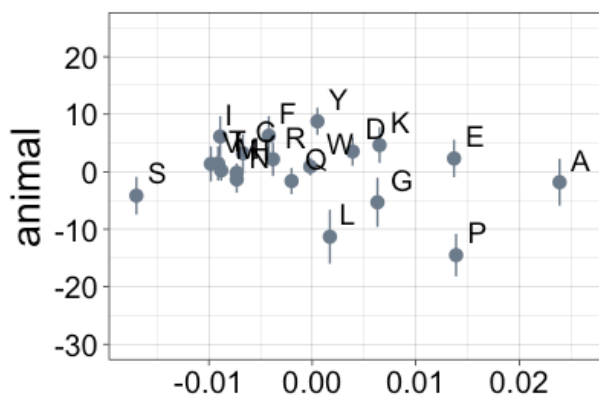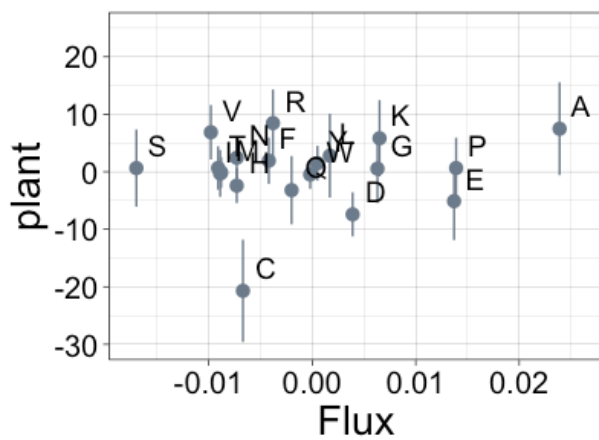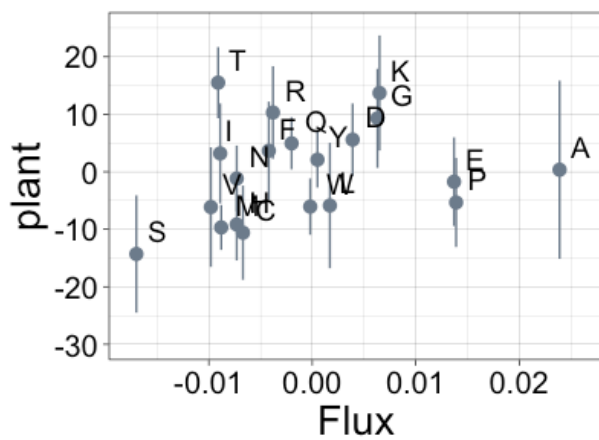

Supplement: supp [file elife-57347-supp-v1.zip]

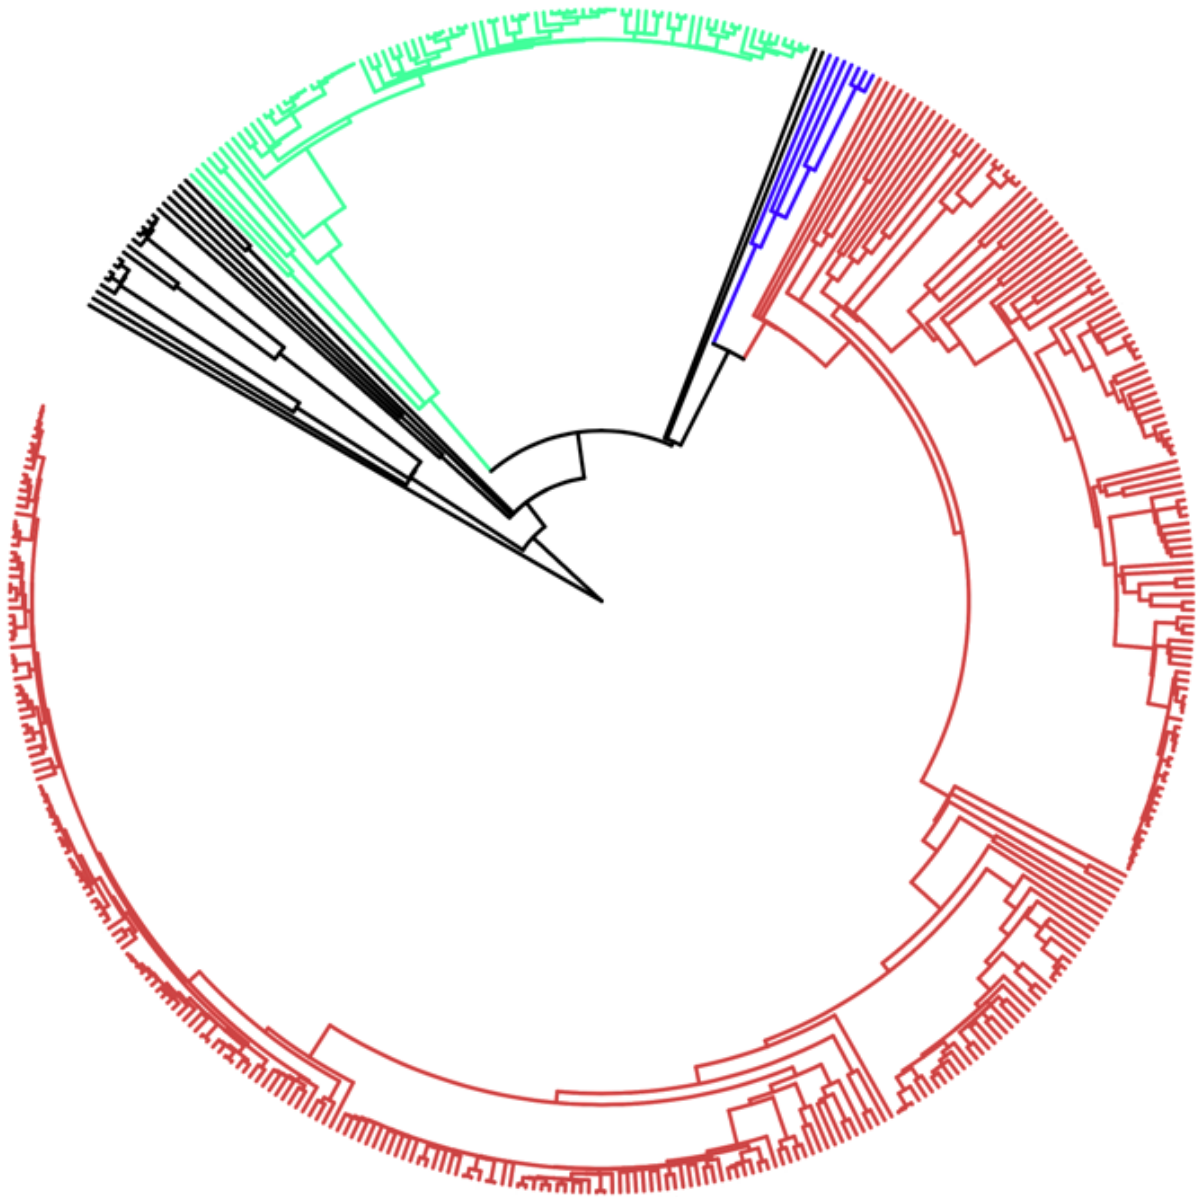

Supplement: supp [file elife-57347-supp-v1.zip]

Nontransmembrane

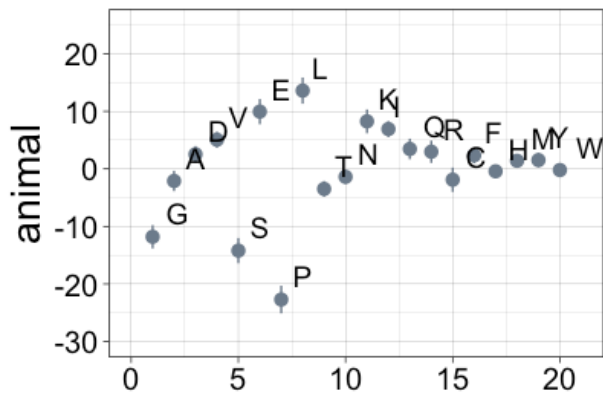

Transmembrane

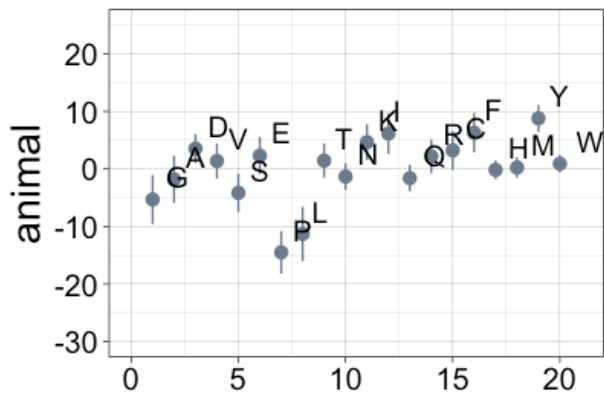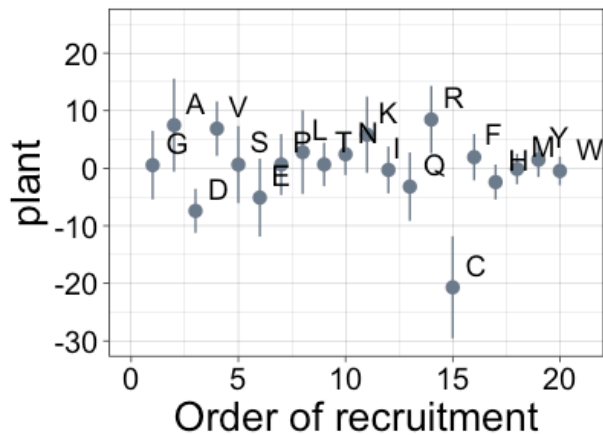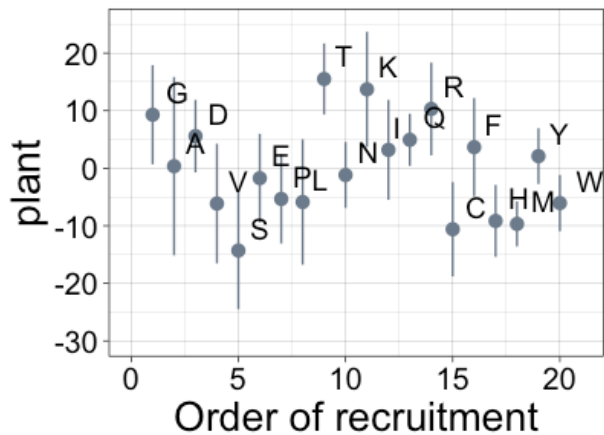

Supplement: supp [file elife-57347-supp-v1.zip]
